*Eraslan G, Arloth J et al.*

# DeepWAS: Directly integrating regulatory information into GWAS using deep learning supports master regulator MEF2C as risk factor for major depressive disorder

Gökçen Eraslan<sup>\*,1</sup>, Janine Arloth<sup>\*,1,2</sup>, Jade Martins<sup>2</sup>, Stella Iurato<sup>2</sup>, Darina Czamara<sup>2</sup>, Elisabeth B. Binder<sup>2,4</sup>, Fabian J. Theis<sup>1,3</sup>, Nikola S. Mueller<sup>1,#</sup>

<sup>1</sup> Institute of Computational Biology, Helmholtz Zentrum München Neuherberg 85764, Germany

<sup>2</sup> Department of Translational Research in Psychiatry, Max Planck Institute of Psychiatry, Munich 80804, Germany

<sup>3</sup> Department of Mathematics, Technische Universität München Garching 85748, Germany

<sup>4</sup> Department of Psychiatry and Behavioral Sciences, Emory University School of Medicine, Atlanta GA 30322, USA

\* These authors contributed equally to this work.

#To whom the correspondence should be addressed: nikola.mueller@helmholtz-muenchen.de

## Abstract

**Background:** Genome-wide association studies (GWAS) identify genetic variants predictive of common diseases but this does not directly inform on molecular mechanisms. The recently developed deep learning-based method DeepSEA uses DNA sequences to predict regulatory effects for up to 1000 functional units, namely regulatory elements and chromatin features in specific cell-types from the ENCODE project.

**Results:** We here describe “DeepWAS”, a conceptually new GWAS approach that integrates these predictions to identify SNP sets per functional units prior to association analysis based on multiple regression. To test the power of this approach, we use

*Eraslan G, Arloth J et al.*

genotype data from a major depressive disorder (MDD) case/control sample (total N=1,537). DeepWAS identified 177 regulatory SNPs moderating 122 functional units. MDD regulatory SNPs were located mostly in promoters, intronic and distal intergenic regions and validated with public data. Blood regulatory SNPs were experimentally annotated with methylation quantitative trait loci (QTLs), expression quantitative trait methylation loci and expression QTLs and replicated in an independent cohort. Joint integrative analysis of regulatory SNPs and the independently identified annotations were connected through transcription factors MEF2A, MEF2C and ATF2, regulating a network of transcripts previously linked to other psychiatric disorders. In the latest GWAS for MDD, the *MEF2C* gene itself is within the top genome-wide significant locus.

**Conclusions:** DeepWAS is a novel concept with the power to directly identify individual regulatory SNPs from genotypes. In a proof of concept study, MEF2C was identified as a master-regulator in major depression, a finding complementary to recent depression GWAS data, underlining the power of DeepWAS.

**Keywords:** GWAS concept, functional data, chromatin features, cell-type specificity, ENCODE, deep learning, multiple regression, major depressive disorder, MEF2, MEF2C

## Background

Genome-wide association studies (GWAS) have been highly successful in identifying genetic variants associated with risk for common diseases[1]. However, going from pure

*Eraslan G, Arloth J et al.*

association to mechanistic insight has been a much more challenging task. The identification of the true functional/causal variants within association signals is hampered by the linkage disequilibrium (LD) block structure of the genome. Due to this structure, the true functional variants can most often not be discerned within associated blocks, which can span several gene loci. One approach to better infer functional variants has been the annotation of association signals by their correlation with more proximal molecular read-outs such as gene expression or DNA methylation in the form of expression and methylation quantitative trait locus (eQTL and meQTL) approaches[2,3]. Very recent approaches such as binding QTL (bQTL) studies for transcription factor (TF) binding now add additional regulatory information[4]. While these approaches can indicate regulatory effects of associated SNPs, they can also not pinpoint single functional variants within an LD block.

To further close the gap of missing functional annotation, additional post-processing approaches, so called functional GWAS[5], have been used. The majority of the previously published functional GWAS studies are based on the overlap of SNPs with cis-regulatory elements such as promoters and enhancers (see Tak and Farnham[6] for a comprehensive review). These functional GWAS indicate that for common disease, the majority of associated SNPs reside in non-coding, regulatory regions[5,7,8]. One drawback of these methods is that the actual impact of the variant on regulatory elements is not assessed and thus not taken into account for the annotation, which does not go beyond positional overlap. For example, two SNPs that localize to the same chromatin immunoprecipitation with massively parallel sequencing[9] (ChIP-seq) peak

Eraslan G, Arloth J et al.

of a TF might have opposing effects or no effects at all. To try to resolve this, *in silico* approaches predicting disruption of transcription factor binding motifs[10,11] have been used, however, our understanding of actual binding based on known motifs is still limited. Given the fact that classical GWAS thus test many variants that are highly unlikely to be functionally relevant, methods integrating functional knowledge of SNP into GWAS could not only allow prioritize relevant variants but also to increase power for such association studies that now often need tens of thousands of cases for robust signals[1].

Recent advances in systems genetics, harnessing the predictive power of deep learning, might have the capacity to enhance the performance of functional SNP prioritization methods. Zhou J and Troyanskaya OG have developed a deep learning method called “DeepSEA” uses only DNA sequence information to predict effects on regulatory chromatin features such as histone marks, TF binding or the presence of open chromatin[12]. For this experimental, publicly available data from the ENCODE project[13] and the Roadmap Epigenomics Project[14] for cell type-specific TF binding, histone modifications and chromatin states was used. This type of functional sequence annotation is superior to pure overlap methods as it computes allele-specific differences in the effects on these regulatory elements and thus discerns SNPs with functional impact, at least in the given cell lines, from those just residing within the annotated element. Furthermore, it allows incorporating cell-type specific regulatory effects of such variants, adding another critical layer to understand disease mechanisms that are often tissue-specific.

*Eraslan G, Arloth J et al.*

93  
94 In this manuscript we present a conceptually new approach fusing classical and  
95 functional GWAS. We obtain regulatory information on SNPs by generating sets of  
96 SNPs in “functional units” using *deep* learning and then performing functional unit-Wide  
97 Association Studies (deepWAS). First, we extracted DNA sequences centred on a SNP  
98 to predict close to 1000 allele-specific regulatory effects of chromatin features in various  
99 cell types (a pair of one chromatin feature in one cell type is further called “functional  
100 unit”) using DeepSEA[12]. Second, the resulting significant regulatory SNPs were then  
101 used to identify sets of SNPs characterized by their joint moderation of a functional unit.  
102 Finally, we identify regulatory SNPs, short “deepSNPs”, each coupled to a functional  
103 unit by associating each set of predicted regulatory SNPs with a trait or disease. To that  
104 end we use a multiple regression model with SNP selection using L1 (“LASSO”)  
105 penalization[15]. By testing regulatory SNPs within each of the confined functional units,  
106 we controlled not only for correlations induced by LD but also for possible joint, thereby  
107 again correlated, SNP effects on two or more chromatin features or cell types for which  
108 LASSO would select one representative SNP. This optimized variant selection improves  
109 our power to identify SNPs that may play a role in the etiology of the disease.

110  
111 For a proof of concept, we used data from a published GWAS for major depressive  
112 disorder (MDD)[16]. Heritability for this disorder has been reported to be up to 40%[17]  
113 and thus comparable with other common diseases, GWAS have, however, only been  
114 successful very recently when including over 110,000 cases and 300,000 controls  
115 identifying 17 independent SNPs associated with MDD at genome-wide significant

*Eraslan G, Arloth J et al.*

level[18,19]. Nonetheless, the required sample size for each discovered disease locus is much higher than for other psychiatric disorders such as schizophrenia, in which independent SNPs have been identified with only 35,000 cases[20]. This difference may be attributed to the possibly higher biological heterogeneity not covered with current phenotyping methods and the large relevance of the environment as a risk factor for MDD. A recent study from our group has reported the importance of genetic variants in specific enhancer regions conferring risk for major depression, likely by gene x stress interactions[21]. DeepWAS, with its focus on variants altering functional regulatory elements, could thus help to promote our understanding of the genetic mechanisms underlying depression risk.

## Results

### DeepWAS approach

To identify SNP sets that potentially affect common regulatory functions in a cell type specific manner, we need to investigate their genomic location and sequence alterations within so called “functional units”. We denote a “functional unit” as a gene-regulatory state of a specific cell type characterized by the mapping of one chromatin feature onto the genome in the absence or presence of additional stimulating/treatment conditions, see **(Figure 1A)**. For example, the functional unit “p53-HeLa” was defined by all genomic regions covered by ChIP-seq peaks of the TF p53 within baseline conditions in the HeLa cell line. For this manuscript, the 919 DeepSEA features [12] are considered

*Eraslan G, Arloth J et al.*

as functional units representing data from the ENCODE project [13] covering combinations of 201 different experimental annotations of epigenetically relevant information. This includes the mapping of different TFs, various DNase hypersensitive (DHS) regions and histone marks across 31 cell lines and 17 treatment conditions. Next, one kilobase DNA sequences were generated for each SNP for both reference and alternative alleles. We used the pre-trained DeepSEA model[12] to predict the probabilities of a SNP allele to moderate a functional unit. DeepSEA is a method that uses deep neural networks and was trained to predict membership of 919 functional units given a one kilobase genomic sequence. To select SNPs moderating a functional unit, we used the metric provided by DeepSEA that estimates the impact of a variant on the functional read out by comparing the probabilities of allele-specific regulation[12]. Therefore, the authors used one million random SNPs from the 1,000 Genomes project [22] as a background distribution to calculate e-values for each functional unit by assessing the proportion of random variants with a bigger effect than that of the observed variants. SNPs with significant e-values, thus potentially having allele-specific effects on a functional unit, were defined as a functional-unit specific SNP set. In other words, only SNPs with a predicted and significant difference in allele-specific regulatory effect for a given genomic feature in a cell type (functional unit) were retained for the subsequent association analysis. When overlapping the available genotypes (measured and imputed) in the case/control samples with the functional-unit specific SNP sets, 919 sets of genotypes filtered by regulatory effect in a functional unit remained for the analysis (**Figure 1B**).

*Eraslan G, Arloth J et al.*

For the final step in the DeepWAS, we used the functional genotypes of the case/control sample and possible confounders to associate SNPs set to a disease or trait (**Figure 1C**). The number of tested SNPs is massively reduced using the above-described functional annotation based on ENCODE data and this variant filtering now enables us to employ regularized regression methods with multiple SNPs. Therefore, each set of regulatory SNPs in one functional unit was subjected to a logistic regression model with L1 regularization (LASSO). In other words, we fitted 919 functional unit-based models to again select regulatory SNPs associated to a trait or disease. For models with at least one non-zero coefficient for a SNP, we further implemented a permutation-based significance test with controlled false positive rate. From all models that withstood this permutation-based multiple testing correction, we finally identified the deepSNPs that are defined as significant non-zero regulatory SNPs associated to the trait or disease and moderating a functional unit. The advantage of DeepWAS over traditional GWAS (**Figure 1D**) is thus twofold, 1) it includes putative regulatory mechanisms in the GWAS analysis from the start and 2) it controls false discovery error by reducing multiple testing.

## DeepWAS of major depressive disorder

We used post-quality control genotype data from 1,537 individuals (739 controls and 798 cases) of a cohort recruited for recurrent major depressive disorder (MDD). The data were imputed to the 1000 Genomes Phase 1 reference panel [22] using SHAPEIT2 [23] and IMPUTE2 [24]. The resulting data set contained more than 1.7 million variants



*Eraslan G, Arloth J et al.*

with MAFs of at least 5% and non-missing genotypes. As expected, a classical GWAS approach failed to identify genome-wide significant associations [16] (**Additional file 1: Figure S1**).

For the DeepWAS approach, a total, 6,685 SNPs and 50,704 SNP-functional unit pairs were retained after filtered for allele-specific effects in a given functional unit at a significance level of  $5 \cdot 10^{-5}$ . These SNPs were then tested for association with depression within 919 LASSO models for each functional unit (see above) including age and sex as additional covariates (number of SNP predictors in 919 LASSO models: min=17, median=51, max=213. See **Additional file 1: Figure S2**). Of these models, 193 had at least one non-zero coefficient for a SNP (number of SNPs with non-zero coefficients in 193 models: min=1, median=2 and max=22). Permutation-based significance test identified 122 out of these 193 models to be below the FDR-adjusted p-value threshold of 0.1 (**Additional file 1: Figure S2** and **Additional file 2 and 3**). In other words, deepWAS identified 122 functional units associated with MDD containing in total 177 deepSNPs moderating 74 chromatin features in 31 cell lines.

We first analysed, whether the MDD deepSNPs were enriched for specific chromatin features or tissue (**Figure 2A**). Not surprisingly, cell lines with a large number of investigated chromatin features such as GM12878, K562 and HepG2 exhibited more significant models since more chromatin features are covered in the data generated from these cell lines. Interestingly, TFs such as c-Myc and EBF1 that are more relevant to cell proliferation did not show significant associations. CTCF on the other hand, an

*Eraslan G, Arloth J et al.*

transcriptional regulator relevant for chromatin conformations important for the function of long-range enhancers showed consistent effects across many cell lines. In fact, genetic variants in long range enhancer have been shown to be highly relevant for common disorders [14] and also major depression [21]. Furthermore, NF- $\kappa$ B and glucocorticoid response element related deepSNPs only become apparent in the stimulation condition, underlining the importance of going beyond pure baseline characterization. Both systems and transcription factors, NF- $\kappa$ B – a major immune regulator and the glucocorticoid receptor – central for the stress response, have been previously implicated in the pathogenesis of MDD [21,25,26] (**Figures 2A and Additional file 1: Figure S2**).

We next investigated the genomic regions in which these deepSNPs reside. Using the UCSC knownGene annotations [27], we observed that vast majority of deepSNPs are in promoters, intronic regions and distal intergenic regions that might indicate enhancers (**Figure 2B**). We then examined the enrichment of deepSNPs in tissue-specific *cis*-regulatory elements using genome annotations of the 15-state ChromHMM model[14]. The promoters are significantly enriched for deepSNPs in 126 out of 127 epigenomes (99%) spanning all tissue groups, whereas the enhancers are only enriched in “Astrocytes Primary Cells - E125” (FDR-adjusted p-value: 0.093) and in “A549 EtOH 0.02pct Lung Carcinoma Cell Line - E114” (FDR-adjusted p-value: 0.006) epigenomes (**Additional file 1: Figure S4**).

*Eraslan G, Arloth J et al.*

To test whether the deepSNPs could be validated for their predicted allele-specific effects in experimental data, we evaluated the effect of cell line-matched deepSNPs on TF binding using previously published binding QTLs (bQTL) [4]. The bQTLs were identified in GM12878 (Lymphoblastic cell line (LCL) from B-Lymphocytes) using a pooled ChIP-seq approach of 60 Lymphoblastic Yoruban cell lines to identify SNPs significantly altering binding of TFs by comparing the allele frequencies in sequencing data before and after the ChIP experiment. Out of 26 deepSNPs in GM12878, we identified eight SNPs (31 %) that were also experimentally validated bQTLs for JunD, Pu.1, NF- $\kappa$ B and POU2f1 (**Additional file 4**).

## Blood deepSNPs overlap with methylation and expression QTLs

Allele-specific effects on chromatin features likely associate with altered transcriptional activation and this is reflected in differences in DNA methylation levels and gene transcription. To test, whether the deepSNPs are indeed preferentially transcriptionally relevant variants, we used DNA methylation and mRNA expression data from peripheral blood in the recMDD samples (see Methods) as well as a second independent sample (MPIP, see Methods). We focused on the detailed analysis of 26 GM12878 deepSNPs (**Figure 3**), as GM12878 is among the best-characterized cell lines, derived from blood cells, B-lymphocytes and amongst the top regulatory cell line identified by the MDD deepWAS.

*Eraslan G, Arloth J et al.*

First, we conducted a methylation quantitative trait locus (meQTL) analysis using whole blood methylation levels of a subset of the recMDD cohort (n=257 individuals). SNP-CpG associations were carried out in a 3Mb *cis*-window around the deepSNPs to assess the effect of nearby CpG sites. From the 26 deepSNPs, we identified 17 significant meQTLs containing seven unique deepSNPs (27 %) and 17 CpGs after Bonferroni-correction for all tested CpGs per SNP (**Table 1**). The majority (>71%) of the meQTL SNPs were associated with more than one DNA methylation site (one to four CpG sites per SNP, **Table 1**). Notably, 25 deepSNPs (96 %) were nominally associated with differential methylation levels ( $p < 0.05$ ). The most significant meQTL is located in an enhancer region and all four identified CpGs in regions epigenetically associate with gene silencing (**Figure 4A**). The genotypes at the intergenic SNP rs9293528 were significantly associated with the methylation levels of four moderately correlated CpGs located approximately 30-55 kb away from the SNP: cg1193710, cg14617041, cg14727987 and cg26653990 (**Figures 4B and 4C**). Sixteen out of the 17 meQTLs were validated in the independent cohort (MPIP cohort, n=229 samples, see Methods), i.e., showed a significant meta-analysis p-value (see Methods) showing equally or more significant associations than in the discovery cohort alone (**Figure 4D and Table 1**).

Interestingly, deepSNPs are also associated with MDD-specific methylation changes. In total we found five deepSNP-CpG pairs with significant differences in the allele-specific methylation profiles between MDD cases and controls in recMDD cohort (see Methods). Two of these MDD specific meQTLs are replicated in the independent MPIP cohort (see **Additional file 1: Table S1 and Additional file 1: Figure S5**).

Eraslan G, Arloth J et al.

Second, we investigated the effects of the identified 17 CpG methylation sites associated to MDD deepSNPs on matched gene expression levels, if CpG and transcripts were within 1.5Mb of genomic distance. This was investigated in the MPIP cohort, as gene expression data were only available in this sample. Among these, we identified three expression quantitative methylation loci (eQTM) comprising two CpGs and three gene expression probes after genome-wide Bonferroni-correction for the number of tested transcripts per CpG (**Additional file 1: Table S2**) and 11 eQTMs (8 CpGs and 9 transcripts) at nominal level. These are: cg19235974-*CACNA2D4* (*Calcium voltage-gated channel auxiliary subunit alpha2delta 4*), cg19235974-*CACNA1C* (*Calcium voltage-gated channel subunit alpha1 C*) and cg21290162-*MSRA* (*Methionine sulfoxide reductase A*). *CACNA1C* has been associated with schizophrenia, bipolar disorder and major depression[28], *CACNA2D4* with late onset bipolar disorder[29] and *MSRA* with both bipolar disorder and schizophrenia [30,31].

Finally, we associated the 26 deepSNPs to gene expression directly, by conducting an expression quantitative trait locus (eQTL) analysis using the MPIP cohort data (n=289 samples). We examined transcripts within a *cis*-window of 1.5Mb upstream and downstream of the deepSNPs for an association with whole blood gene expression profiles. We identified three deepSNPs with significant eQTL: rs12541159-*MSRA*, rs1868881-*TIMM10* and rs4646797-*ALDH3A2* (**Additional file 1: Table S3**).

Interestingly, at nominal significance level we found 27 eQTLs (12 deepSNPs and 27 transcripts).

*Eraslan G, Arloth J et al.*

294

295 Overall, the investigation of the functional consequences of a hematopoietic tissue-  
296 relevant set of deepSNPs in experimental data indicates that these indeed preferentially  
297 tag meQTLs and eQTLs and are thus transcriptionally relevant.

298

## 299 Predicted regulatory effects of deepSNPs in MDD

300 Finally, we integrated the analysis results of meQTLs, eQTLs, eQTM in peripheral  
301 blood with our GM12878 deeSNPs to explore power of the deepWAS approach for  
302 identifying novel, putative disease mechanisms. We combined all pairwise links of  
303 meQTL (SNP-CpG), eQTL (SNP-gene), eQTM (CpG-gene) and deepSNP-chromatin  
304 features and illustrated them in a network (**Figure 5A**).

305

306 One of six deepSNPs, rs12541159, had a meQTL and eQTL and at the same time  
307 harboured an eQTM, in which the CpG site was affecting the transcriptional levels of the  
308 same gene (**Figure 5B**). By regulating the methylation and expression profiles of  
309 multiple genes via common TFs, deepSNPs may represent putative master regulators  
310 of in a given disease. The intergenic deepSNP rs12541159 was predicted to affect  
311 binding of the MEF2C TF, correlated with blood methylation levels of two intergenic  
312 CpGs (cg21290162 cg11269159) and one exonic CpG cg27411982 with blood gene  
313 expression of *MSRA* residing 517 kb (**Figure 5B**, box 1 and **5C**). The CpGs  
314 themselves showed no correlation to each other (**Figure 5D**). The transcriptional levels  
315 of *MSRA* were associated with increased cg21290162 methylation (**Figure 5E**). This,

Eraslan G, Arloth J et al.

motivated us to infer causality and we investigated whether the CpG site could fully explain the observed association between the SNP and *MSRA* expression using causal inference testing[32]. We found partial mediation of the effect of rs12541159 on *MSRA* expression by DNA methylation status of CpG site cg21290162 (**Figure 5E**,  $p = 0.043$ ).

Strikingly, the deepWAS results connected the independently identified six SNPs of the nine molecular QTLs (see Figure 5A) through a family of TFs, namely MEF2A (*myocyte enhancer factor 2A*), MEF2C (*myocyte enhancer factor 2C*) and ATF2 (*activating transcription factor 2*). Predicted regulatory effect to identical SNPs suggest TF co-localization, which has been not been reported so far. We thus utilized ReMap annotation tool [33] to study co-localization and identified a significantly overlap of TF ChIP-seq peaks for these three TFs (**Additional file 1: Figure S6**). Interestingly, a SNP in the locus encompassing the MEF2C gene is the top locus of the largest GWAS for MDD so far, with a  $p < 10^{-16}$ [19]. Similarly, we identify a regulatory effect of a second TF, P300, of which the respective EB300 gene was a GWAS locus in the discovery cohort[19].

## Discussion

In classical GWAS all SNPs are tested independently and in a fully genome-wide manner, thereby implicitly assuming that any SNP can moderate the function of any cell state at any time. It is now clear that disease associations especially to common disorders are driven by SNPs altering the function of regulatory elements. Hence it is

*Eraslan G, Arloth J et al.*

likely not necessary to test all SNPs in GWAS but instead useful to focus on functional annotation to help prioritize putative risk variants[14].

In this manuscript, we address this idea by directly integrating the functional data into the GWAS approach itself. To that end, we employed the powerful DeepSEA method [12] that uses raw DNA sequence data to predict regulatory effects of 919 chromatin features (from the ENCODE project) in various cell types, termed “functional unit” here. These predictions enable determining allele specific effects of single SNPs by comparing predictions of reference and alternative allele sequences (**Figure 1**). As deep learning refers to the idea of learning multiple levels of representations and relevant features from the raw input, it eliminates the need for manual feature extraction, such as extracting k-mer frequencies for DNA sequence analysis [34]. To our best knowledge, our study is the first to use deep learning-based predictors to identify regulatory SNPs in GWAS. All identified deepSNPs were predicted to have a specific regulatory effect of a chromatin feature in a defined cell type (functional unit), thereby allowing having directly testable hypotheses of regulatory mechanisms in a trait or disease.

Our deepWAS approach is superior to simply overlapping peaks or tracks of chromatin features to GWAS signals, even though it is computationally more expensive due to the deep learning-based predictions, cross-validated LASSO models and permutation-based model selection. In contrast to annotation-based methods, data-driven methods, such as DeepSEA, have a high predictive power on a single base resolution (by



*Eraslan G, Arloth J et al.*

comparing predictions of reference and alternative allele sequences) and not only for larger stretches of sequence underlying one or several chromatin features. It thus enables us to systematically assess the effects of sub-threshold SNPs that are missed in classical approaches. DeepWAS does not identify genomic loci containing many possible regulatory SNPs, but identifies single deepSNPs with predicted allele-specific regulatory effect in a function unit, a cell-type and chromatin feature.

The second major methodological advantage of deepWAS is the implementation of multiple (multi-SNP) regression models with L1 regularization (called LASSO regression) selecting only a few SNPs, so-called deepSNPs. The deepSNPs of one functional unit are only selected when they jointly associate with the disease or trait. Multiple regression models are relatively new in the field of GWAS, nonetheless already show promising result [35,36]. A related multi-SNP approach used pre-clustering of LD blocks prior to LASSO modelling [37]. Models with millions of SNPs are less powerful to associate SNPs, most probably due to the high correlation structure induced by LD. The power of a pre-selection of regulatory SNP sets is underlined by the fact that when all predicted regulatory SNPs (neglecting the information on functional units) were used as input to a single LASSO regression model only one SNP (rs8180478 in osteoblast-H2A.Z functional unit) showed significant association with MDD. This is in contrast to the 177 deepSNPs identified using the pre-selection models.

Currently deepWAS has two main limitations. First, the proposed study was designed for best-guess genotype data (i.e. 0-1-2 encoding). Since LASSO models require full

*Eraslan G, Arloth J et al.*

genotype information for all samples, the numbers of SNPs entering the analysis had to be reduced due to quality control procedures. To address this issue, we are planning to extend the method for dosage data (i.e. probabilistic representation of genotypes) to increase the range of predicted regulatory effects. This will also necessitate as re-evaluation of the LASSO model as many more SNPs in high LD will enter the analysis. The second limitation is the current comprehensiveness of regulatory element catalogues like ENCODE and Roadmap. ENCODE lacks for example a number of relevant disease-specific stimulation conditions as well as disease-related tissues, in our case brain tissues, which are important for psychiatric disease. Our previous and related studies indicated the importance to test SNPs in stimulated conditions, like TNFalpha and glucocorticoids receptor agonist dexamethasone conditions activating NF-kB and GR, respectively [21]. Data from cell lines or bulk tissues will miss variants with effects only in rare cell types or cell type specific effects in native tissue. It is therefore important to be able to retrain the DeepSEA neural network with additional publicly available chromatin features and as well as newly generated experimental data. This will be possible using the deepWAS code publicly available at DOI: 10.5281/zenodo.59282. Additional data, from efforts such as the PsychENCODE will make deepWAS even more powerful in the future.

The power of DeepWAS could be demonstrated in our small GWAS sample for MDD[16]. Only using a subset of SNPs in functionally confined, regulatory units, we identify risk variants for MDD even though the classical GWAS in this small sample was negative (**Additional file 1: Figure S1**). The results in this small MDD sample illustrate

*Eraslan G, Arloth J et al.*

the power of deepWAS. 1) DeepSNPs were identified in cell types and enhancers previously shown to be relevant for depression. Furthermore, using the stimulation conditions, the importance of both immune system regulator NF- $\kappa$ B and the glucocorticoid receptor system for depression was also observed in this study. Both systems have been implicated by a large number of previous publications [21,25,26]. 2) deepSNPs for MDD were highly likely to be functional in experimental data and impact both DNA methylation and gene expression (**Figure 4 and Table 1, Additional file 1: Table S2 and Table S3**) as shown by their effects meQTL, eQTL and eQTM analyses. Interestingly, for some of these, differential genotypic effects by major depression status were observed (**Additional file 1: Figure S5 and Table S1**). 3) The integrated analysis of eQTL, meQTL and eQTM results with the GM12878 deepSNPs, identified the MEF2 TF family, including MEF2C, as important risk factors in MDD (**Figure 5**). The MEF2 TF family was already identified to play a major role in neuronal plasticity, which is an important component in disease development of stress-related disorders, like MDD and other psychiatric disorders. Chen and colleagues[38] identified the TF MEF2 as a master regulator of developmental metaplasticity, which is important to guide developmental structural and functional neuronal plasticity. Additional evidence was found by Barbosa et al [39]. Relating MEF2 to activity-dependent dendritic spine growth and suggesting that this TF may suppress memory formation [39,40]. Most relevant for this study, SNPs in the locus encoding MEF2C are the top signal in the latest meta-analysis for major depression with over 130,000 MDD cases and 310,000 controls [19] and minimum p-value of  $9.99 \times 10^{-16}$ . Our study now identified SNPs altering the binding of this TF to target transcript as relevant for MDD. This implies that not only SNPs in the

*Eraslan G, Arloth J et al.*

MEF2C locus itself, as seen in the meta-analysis for MDD [19] but also SNPs altering its binding in target transcripts, as observed in our deepWAS, are associated with major depression. This shows that our approach focused on regulatory SNPs was able to generate complementary functional data to the largest classical GWAS for MDD to date suggesting that not only transcriptional regulation of MEF2C itself but also of its downstream targets is relevant for MDD.

Our results supports the transcription factor MEF2C as a master regulators in MDD. In fact we observed that transcripts affected by differential MEF regulation included a network of genes previously implicated in psychiatric disorders. This includes *CACNA1C*, a gene encoding a voltage gated calcium channel that has reported genome-wide significant associations for schizophrenia as well as associations for bipolar disorder and major depression in previous studies[28] as well as another voltage-gated calcium channel, *CACNA2D4* that has been linked to late onset bipolar disorder [29]. *MRSA* has been associated with both bipolar disorder and schizophrenia [30,31] .

## Conclusions

Our data indicate that deepWAS, a method combining classical GWAs with deep learning based functional SNP annotation is a powerful tool to uncover disease mechanisms for common disorders, including relevant cell types. It also allows to directly identify functional SNPs by having a single base resolution and not being limited

Eraslan G, Arloth J et al.

by the LD structure of the locus. With ever increasing amounts of available functional data the deepWAS approach will become even more valuable and allow to integrate both publicly as well as unpublished data generated by individuals labs. DeepWAS is a versatile tool, publicly available and together with available code from DeepSEA applicable to any GWAS data.

## Figures

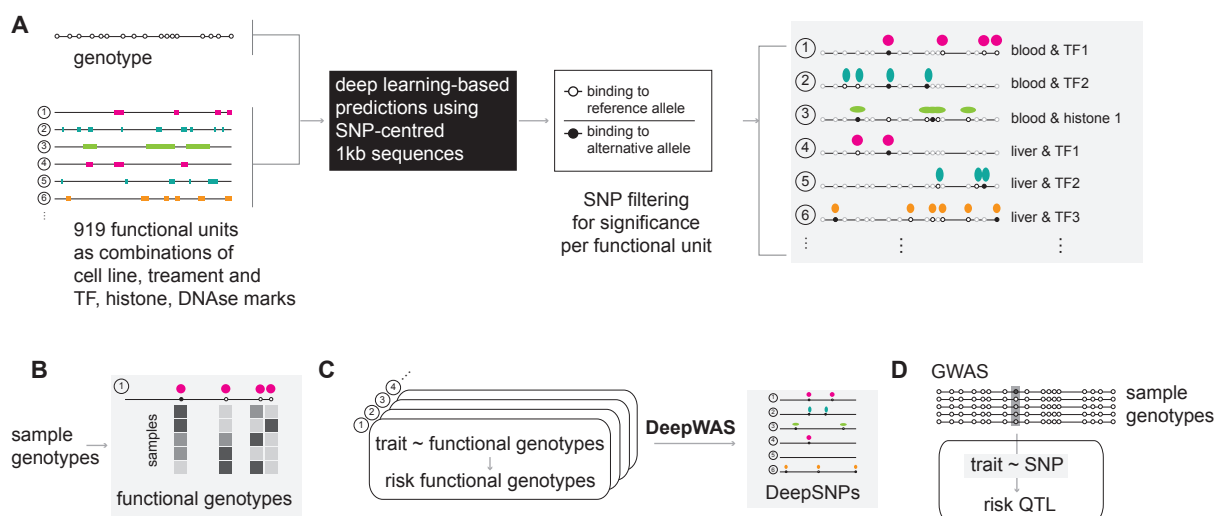

Figure 1

**Figure 1: DeepWAS approach.** (A) The first step of the workflow corresponds to a regulatory variant filtering procedure where only the SNPs with significant regulatory effect are retained in the analysis. Prediction of significant regulatory variants is performed using a pretrained deep neural network, namely DeepSEA, and e-values are calculated by comparing the regulatory effects of observed SNPs to randomly selected

*Eraslan G, Arloth J et al.*

466 SNPs. **(B)** We define the functional genotype as the intersection of all SNPs assessed  
 467 (genotyped and imputed) in a sample and the preselected SNPs from DeepSEA. **(C)**  
 468 The association between disease and retained regulatory variants are interrogated via  
 469 regularized logistic regression. A regression model is fitted for each functional unit that  
 470 is define by tested TF/histone mark/DNase effects, the cell line and the specific  
 471 treatment e.g. NF- $\kappa$ B -GM12878-TNF $\alpha$ ) where only the SNPs with a regulatory effect in  
 472 the specific cell type context are included as covariates. **(D)** The classical GWAS design  
 473 focuses on allele frequency differences and does not include information on the  
 474 regulatory impact of the tested variants.  
 475

Eraslan G, Arloth J et al.

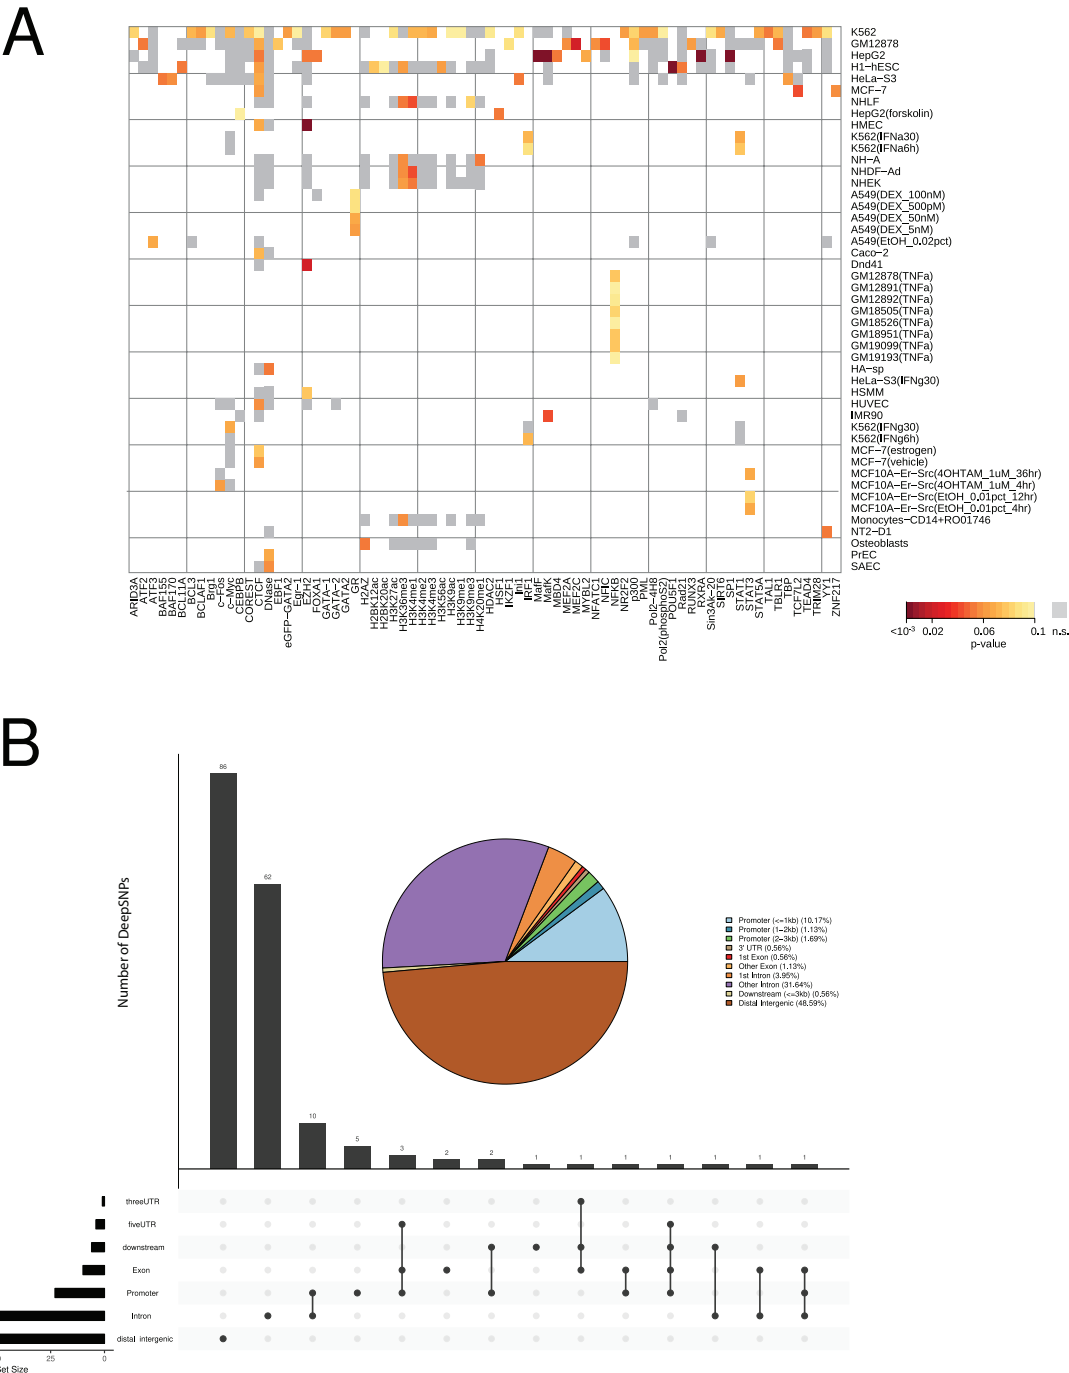

**Figure 2: Significance of DeepWAS models and overlap of deepSNPs with**

**functional annotations (A)** Results of the significance test is given in heatmap. Every functional unit is represented by the p-value, which shows the FDR-adjusted significance of the corresponding LASSO model. Missing values, represented in white,

Eraslan G, Arloth J et al.

show functional units for which no data were available. The models of the functional units with LASSO coefficients with  $p > 0.1$  and those without any non-zero coefficients are shown in grey and those with  $p < 0.1$  in shades from yellow to red, with red representing the most significant models. **(B)** Overlap of deepSNPs with genomic elements is performed using UCSC knownGene annotations. Vast majority of deepSNPs overlap with non-coding genomic regions.

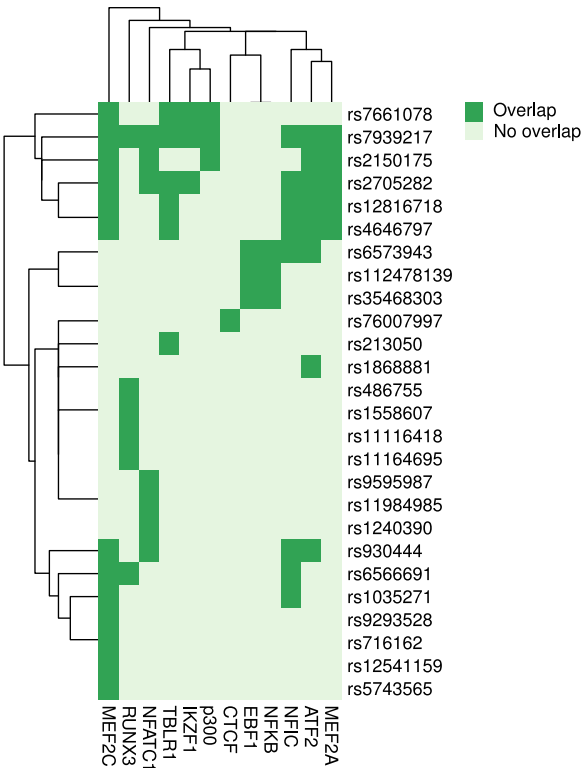

**Figure 3: Transcription factors harbouring deepSNPs in GM12878 cell line.** In data from GM12878 26 deepSNPs are predicted to affect the binding to 12 TFs. Group of SNPs that are overlapping exclusively with a group of TFs are highlighted



Eraslan G, Arloth J et al.

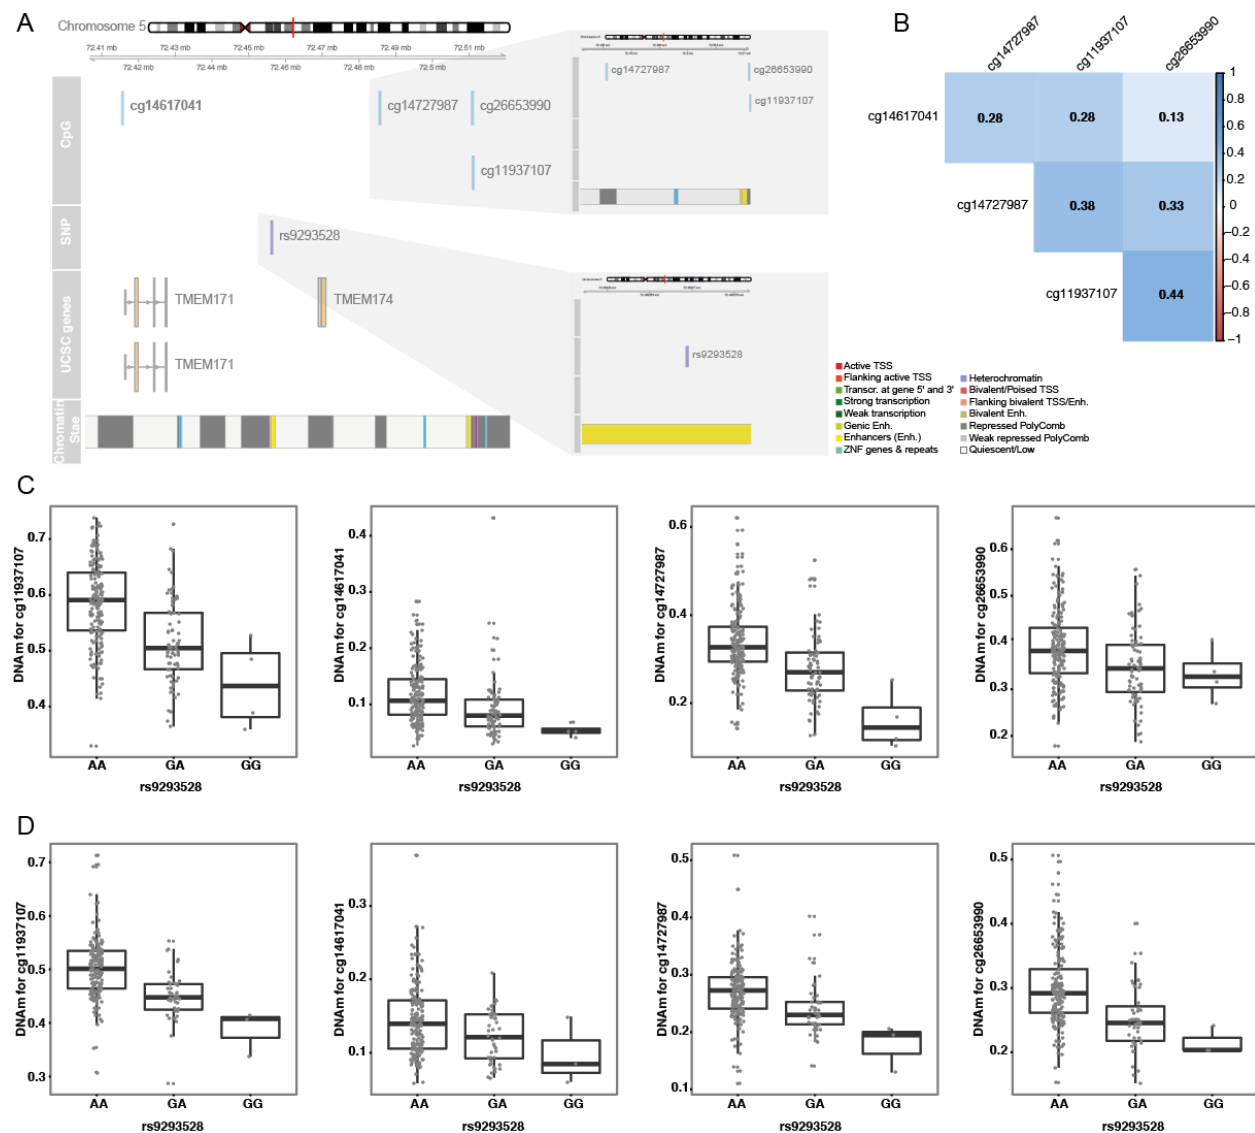

**Figure 4: meQTL results for the GM12878 deepSNP rs9293528.** (A) Overview of the rs9293528 meQTL locus on chromosome 5. Top panel, ideogram for chromosome 5. A red box indicates the region shown enlarged in the bottom panels. Bottom panels: Location of CpGs (n=4) that are significantly associated with rs9293528 genotypes, SNP position, genes nearby (based on UCSC knownGene annotation) and annotation of chromatin states (based on GM12878 15-state core ChromHMM model). (B) Matrix of Pearson's correlation coefficients between the DNAm levels (beta values) of cg1193710, cg14617041, cg14727987 and cg26653990. (C) meQTLs between

*Eraslan G, Arloth J et al.*

501 rs9293528 and cg1193710, cg14617041, cg14727987 and cg26653990 within the  
502 recMDD cohort. **(D)** Replication of those meQTLs in the MPIP cohort. Y-axis in C and D  
503 displays the DNAm level of a particular CpG site and the x-axis indicates rs9293528  
504 genotype.  
505

Eraslan G, Arloth J et al.

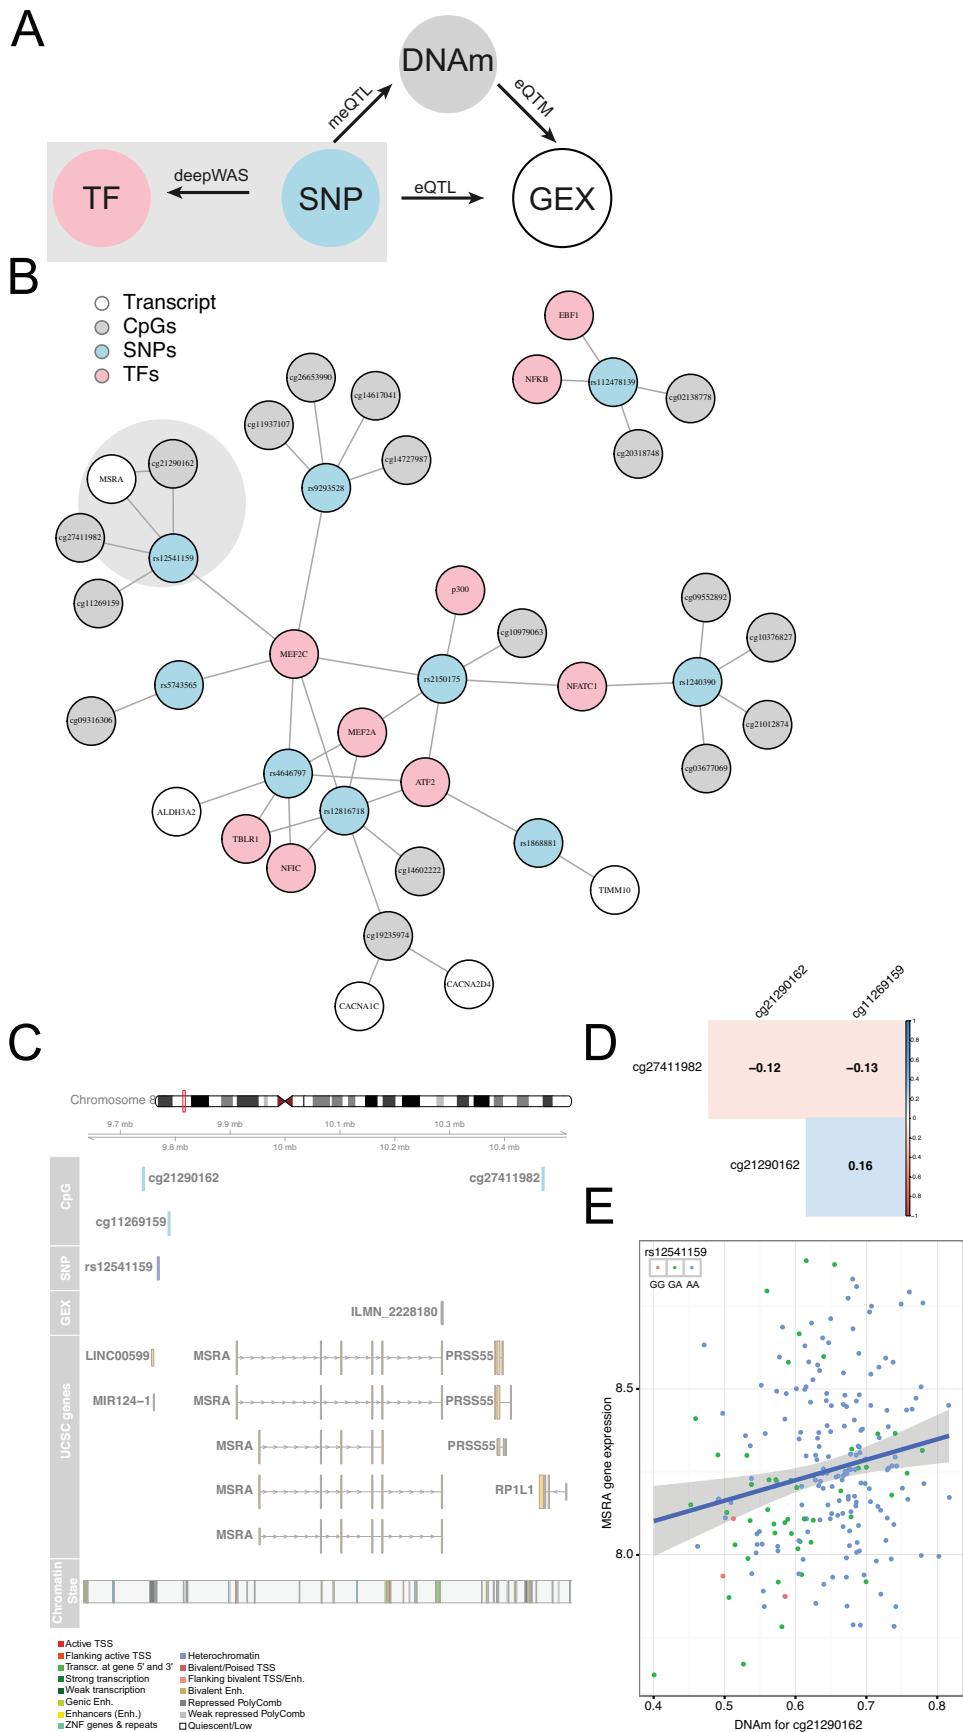

*Eraslan G, Arloth J et al.*

## Figure 5: Joint analysis of all significant meQTL, eQTL, eQTM and deepWAS

**results: (A)** Schematic illustration of our joint analysis. Grey box highlighting the MDD disease effect. **(B)** Network visualization of the joint analysis. Edges represent the association relation of deepSNPs, CpGs, TFs and transcripts. The grey circle highlights the deepSNP rs12541159, which coincides all types of QTLs. **(C)** Regional plot for the deepSNP rs12541159 locus: with top panel illustrating the ideogram for chromosome 8. Bottom panels the location of CpGs (n=3) that are significantly associated with rs12541159 genotypes, SNP position, gene expression probe position sig. association with rs12541159, genes nearby (based on UCSC knownGene annotation) and annotation of chromatin states (based on GM12878 ChromHMM). **(D)** Matrix of Pearson's correlation coefficients between the DNAm levels (beta values) of cg27411982, cg11269159 and cg21290162. **(E)** Relationship between cg21290162 methylation, MSRA expression, and deepSNP rs12541159 genotype in MPIP samples, including mediation effect rs12541159 → cg21290162 → MSRA expression.

## Tables

| CpG        | SNP         | Chr | SNP Position | SNP Location | Genes near SNP | CpG Position | CpG Location | Genes near CpG   | P-value  | Validation in MPIP |
|------------|-------------|-----|--------------|--------------|----------------|--------------|--------------|------------------|----------|--------------------|
| cg02138778 | rs112478139 | 20  | 25110965     | intergenic   | VSX1,LOC284798 | 25172805     | intergenic   | LOC284798,ENTPD6 | 6.72e-06 | yes                |
| cg20318748 | rs112478139 | 20  | 25110965     | intergenic   | VSX1,LOC284798 | 25605228     | upstream     | NANP             | 0.00306  | yes                |
| cg03677069 | rs1240390   | 10  | 88725984     | intergenic   | SNCG,ADIRF     | 88718366     | UTR5         | SNCG             | 0.0148   | yes                |
| cg09552892 | rs1240390   | 10  | 88725984     | intergenic   | SNCG,ADIRF     | 88718324     | UTR5         | SNCG             | 0.0229   | yes                |

*Eraslan G, Arloth J et al.*

|            |            |    |          |            |                 |          |            |                |          |     |
|------------|------------|----|----------|------------|-----------------|----------|------------|----------------|----------|-----|
| cg10376827 | rs1240390  | 10 | 88725984 | intergenic | SNCG,ADIRF      | 88730374 | exonic     | ADIRF          | 0.0142   | yes |
| cg21012874 | rs1240390  | 10 | 88725984 | intergenic | SNCG,ADIRF      | 88718443 | UTR5       | SNCG           | 0.000177 | yes |
| cg11269159 | rs12541159 | 8  | 9769098  | intergenic | MIR124-1,MSRA   | 9788795  | intergenic | MIR124-1,MSRA  | 0.00265  | yes |
| cg21290162 | rs12541159 | 8  | 9769098  | intergenic | MIR124-1,MSRA   | 9741960  | intergenic | TNKS,LINC00599 | 0.000191 | yes |
| cg27411982 | rs12541159 | 8  | 9769098  | intergenic | MIR124-1,MSRA   | 10470102 | exonic     | RP1L1          | 0.0105   | no  |
| cg14602222 | rs12816718 | 12 | 969800   | intronic   | WNK1            | 1025664  | exonic     | RAD52          | 0.00226  | yes |
| cg19235974 | rs12816718 | 12 | 969800   | intronic   | WNK1            | 1063197  | intergenic | RAD52,ERC1     | 0.0386   | yes |
| cg10979063 | rs2150175  | 6  | 97269213 | intronic   | GPR63           | 97285872 | upstream   | GPR63          | 0.000352 | yes |
| cg09316306 | rs5743565  | 4  | 38805983 | UTR5       | TLR1            | 38807387 | upstream   | TLR1           | 4.9e-05  | yes |
| cg11937107 | rs9293528  | 5  | 72456267 | intergenic | TMEM171,TMEM174 | 72511061 | intergenic | TMEM174,FOXD1  | 9.81e-10 | yes |
| cg14617041 | rs9293528  | 5  | 72456267 | intergenic | TMEM171,TMEM174 | 72415688 | upstream   | TMEM171        | 0.00791  | yes |
| cg14727987 | rs9293528  | 5  | 72456267 | intergenic | TMEM171,TMEM174 | 72485684 | intergenic | TMEM174,FOXD1  | 6.44e-07 | yes |
| cg26653990 | rs9293528  | 5  | 72456267 | intergenic | TMEM171,TMEM174 | 72510846 | intergenic | TMEM174,FOXD1  | 0.0104   | yes |

**Table 1:** Significant GM12878 deepSNPs representing a meQTL (GSK cohort). P-values were corrected according to Bonferroni.

## Additional files

**Additional file 1:** Supplementary Figures S1-S6 and Tables S1-S3 (PDF)

**Additional file 2:** List of MDD deepWAS results. Table lists deepWAS results for MDD. Triplet of the first three columns together form a functional unit. (XLS)

- Cell Line: Name of cell line of the functional unit
- Chromatin Feature: Name of chromatin feature of the functional unit
- Treatment: Name of Treatment of the cell line of the functional unit
- SNP: The deepSNPs jointly associated to MDD using deepWAS

*Eraslan G, Arloth J et al.*

**Additional file 3:** Significance of LASSO models with number of predictors in each

model (XLS)

- Cell line: Name of cell line of the functional unit
- Chromatin feature: Name of chromatin feature of the functional unit
- Treatment: Name of Treatment of the cell line of the functional unit
- pval.adj: FDR-adjusted p-values which represent the significance of a regression model
- pval: p-values which represent the significance of a regression model
- devratio: Deviance ratio used as a test statistic for quantify the significance of regression model
- n.snps: Number of SNPs that are used as predictors in regression models
- n.nonzero.snps: Number of predictors selected by LASSO approach (i.e. covariates with non-zero coefficients)

**Additional file 4:** Overlap of bQTLs and MDD deepSNPs. Overlap of MDD deepSNPs in cell line GM12878 with public bQTL study in same cells. (XLS)

- Chr: Chromosome number
- Pos.h19: Genomic position of SNP in hg19 assembly
- Rsid: SNP identifier
- bQTL.ref: Reference allele base extracted from bQTL study
- bQTL.alt: Alternative allele base extracted from bQTL study
- bQTL.pval: p-value extracted from bQTL study
- Higher Binding Allele: Base of higher binding allele extracted from bQTL study
- bQTL.TF: Transcription factor extracted from bQTL study
- deepwas\_TF: Transcription factor identified using MDD deepWAS and rsid

# Methods

## Clinical Samples

### recMDD

The sample consists of 1,537 Caucasian individuals (with 84%, n=1294 of German origin) recruited at the Max-Planck Institute of Psychiatry (MPIP) in Munich, Germany and two satellite hospitals in the Munich metropolitan area (BKH Augsburg and Klinikum Ingolstadt): 739 controls (500 females, 239 males) and 798 cases diagnosed with recurrent major depression (526 females, 272 males). Please see Muglia et al.[16] for more detail in sample recruitment and characterization. All subjects are independent from the MPIP collection below.

### MPIP

The group of subjects consists of 289 Caucasian individuals of the Max-Planck Institute of Psychiatry (MPIP), 93 women and 196 men. Recruitment strategies and further characterization of the MPIP cohort have been described previously[21]. One hundred sixty of them were healthy (115 men, 45 women), 129 (81 men, 48 women) had a depressive disorder treated at the MPIP's hospital in Munich.

## Genotype data and Imputation (GSK & MPIP)

Human DNA of the GSK and MPIP cohort samples was isolated from EDTA blood samples using the Gentra Puregene Blood Kit (Qiagen) with standardized protocols. Genome-wide SNP genotyping was performed using Illumina HumanHap550 Quad

*Eraslan G, Arloth J et al.*

(GSK), Illumina Human610-Quad (MPIP) and OmniExpress (MPIP) genotyping BeadChips according to the manufacturer's standard protocols. Quality control (QC) of genotyped data was conducted in PLINK 1.90b3s [20] separately for each cohort and genotyping BeadChip. QC steps on samples included removal of individuals with genotyping rate < 2 %, cryptic relatives (PI-HAT > 0.05), and genetic outliers (distance in first two MDS components from mean > 2 SD). QC steps on variants included removal of variants with call rate < 2 %, MAF < 5% and HWE test p-value  $\leq 10^{-6}$ . Furthermore, variants on non-autosomal chromosomes were excluded, resulting in GSK: 481,178, MPIP: 481,762 (Human610-Quad) and 544,908 (OmniExpress) SNPs. These sets of SNPs comprised the input for imputation, which was performed separately for each cohort and genotyping BeadChip using IMPUTE v2[24] with the following parameters: 1000G phase I reference panel (released in June 2014, ALL samples), SHAPEIT [23] phasing. QC of imputed probabilities was conducted in QCTOOL 1.4 (<http://www.well.ox.ac.uk/~gav/qctool/>). Imputed SNPs were excluded if the HWE test p-value  $\leq 10^{-6}$  and the info metric < 0.8. Called genotypes ("best guess genotypes" with a probability of 70%) were used for further analysis. SNP sets of the MPIP cohort were merged together. GSK and merged MPIP SNPs were further processed in PLINK and variants were excluded if their MAF < 5% and best guess genotypes are not called (call rate = 100%). This yielded a total of 1.78 Mio GSK SNPs and 3 Mio MPIP SNPs. To annotate SNPs for the closest genes, we used Annovar version Februar 2016 [41] with the UCSC knownGene annotations. SNP coordinates are given according to hg19.



*Eraslan G, Arloth J et al.*

## Prediction of regulatory effects

In this study, we employed DeepSEA[12] to determine the SNPs that might play an important role in MDD by acting through the alteration of regulatory elements. Pretrained DeepSEA network (v0.94) was downloaded from <http://deepsea.princeton.edu/help/> and the predictions of 1.7M SNPs were generated using NVIDIA GeForce GTX TITAN X GPU (Maxwell) in 10 hours. Next step, filtering of regulatory SNPs, was performed using generated so-called “e-value” files that represent the significance of the regulatory effect of SNPs. We applied an e-value cutoff of  $5 \cdot 10^{-5}$  where we only take the SNPs that are associated to at least one functional unit into consideration e.g. (rs1035271, GM12878, MEF2C). Set of SNPs that have an impact on functional unit  $k$  is depicted here as set  $S_k$ .

We then employed a simple probabilistic genotype encoding where allele-specific regulatory probability of the reference or alternative alleles is used if genotype is reference or alternative homozygous, respectively. If the genotype of the individual is heterozygous then the mean of two allele probabilities are used. Here, we refer to the genotype matrix (1,537 x 1.7M) as  $G$  where the rows are individuals and columns are SNPs. Genotypes in the  $G$  matrix is encoded such that  $G_{ij} \in \{0, 1, 2\}$  where we simply count an arbitrarily chosen allele. We then define  $D$  as a tensor representing the allele-specific probabilities for each SNP, functional unit and allele. For example  $D_{jk}^{(ref)}$  refers to the probability of reference allele of  $SNP_j$  in the context of functional unit  $k$ . Therefore, the SNP encoding scheme can be described in terms of  $G$  and  $D$  matrices:

*Eraslan G, Arloth J et al.*

$$X_{ijk} = \begin{cases} D_{jk}^{(ref)} & \text{if } G_{ij} = 0 \\ D_{jk}^{(alt)} & \text{if } G_{ij} = 2 \\ \frac{D_{jk}^{(ref)} + D_{jk}^{(alt)}}{2} & \text{if } G_{ij} = 1 \end{cases} \quad G_{ij} \in \{0, 1, 2\}$$

627

628 or equivalently

629

$$X_{ijk} = G_{ij} \left( \frac{D_{jk}^{(alt)} - D_{jk}^{(ref)}}{2} \right) + D_{jk}^{(ref)}$$

631

632 Here the subscripts  $i, j$  and  $k$  represent individual, SNP, and functional unit indices,  
633 respectively. Resulting encoded matrix is 1,537 x 6,143,515 where we store all SNP-  
634 functional unit pairs (919 x 6,685) for all individuals using “bigmemory” R package[32] in  
635 order to limit the memory consumption. During model fitting, however, only the list of  
636 SNPs in sets  $S_k$  are used.

## 637 DeepWAS

638 Penalized regression models

639 Compared to the classical GWAS approaches where the trait of interest is regressed  
640 separately on each SNP, regularized regression approaches provide an alternative way  
641 to handle high dimensional data and to identify SNPs associated with the trait of interest  
642 using variable selection. Here we utilize L1-regularized logistic regression (LASSO) for  
643 variable selection. 919 different LASSO models are fitted for each functional unit in

*Eraslan G, Arloth J et al.*

order to estimate the statistical association between the disease status ( $y=0$  for controls, and 1 for cases) and SNPs in the context of a specific cell line:

$$\text{logit } P(y_i = 1) = \beta_{0k} + \sum_{j \in S_k} \beta_{jk} X_{ijk} + \beta_{sex,k} sex_i + \beta_{age,k} age_i$$

where  $k$  is used as a model index. Note also that the regression coefficients are model specific and therefore indexed with  $k$ . In each LASSO model, only the SNPs that are significantly affecting the binding of a specific TF in a specific cell line are included as covariates. This is represented in the equation by the summation over the elements of  $S_k$ .

Note that the simple probabilistic encoding does not affect the variable selection, because the effect goes away during the standardization of the design matrix except for possible sign flips. Yet, it leads to the effect sizes that are scaled based on the allele-specific regulatory probabilities reported by DeepSEA since the effect sizes in logistic regression are reported in the scale of original covariates.

The parameters ( $\beta$ ) of the logistic regression are optimized with L1 regularization:

$$\min_{\beta} \sum_{i=1}^M \left[ y_i - \beta_{0k} - \sum_{j \in S_k} \beta_{jk} X_{ijk} + \beta_{sex,k} sex_i + \beta_{age,k} age_i \right]^2 + \lambda \|\beta\|_1$$

*Eraslan G, Arloth J et al.*

where  $M$  is the number of individuals,  $\lambda$  parameter represents the strength of the regularization and  $\beta$  vector represents model parameters. We fitted L1-regularized logistic regression model (LASSO) using glmnet R package[42]. Regularization parameter  $\lambda$  is determined by 100-fold cross validation after which we used “lambda.1se” value to determine non-zero parameters.

# Permutation-based significance test

We used a permutation-based approach to select significant LASSO models with non-zero coefficients and to control false discovery rate. We generated 1000 random permutations of the response variable and fitted LASSO models on each.  $\lambda$  parameter in each model is determined by 10-fold cross validation in order to reduce the computational cost. After fitting LASSO models on the permuted data, deviance ratio is used as a test statistic.

$$deviance\ ratio = 1 - \frac{D}{D_{null}} \text{ where } D = 2 (L_S - L_P) \text{ and } D_{null} = 2 (L_S - L_N)$$

Here  $L_S, L_P$  and  $L_N$  are the log likelihoods of saturated model (model with a free parameter per individual), proposed model and null model (intercept model), respectively. Empirical p-values are calculated as the number of permuted models with a deviance ratio greater than or equal to the proposed model divided by 1000. After FDR[34] multiple testing correction with threshold of 10%, models with lower adjusted p-values are retained.

*Eraslan G, Arloth J et al.*

## 685 Functional annotation of deepSNPs

### 686 Enrichment of Roadmap cis-regulatory elements

687 In order to quantify the enrichment of deepSNPs in *cis*-regulatory elements identified by  
 688 Roadmap Epigenomics Project[14], we first downloaded the segmentation files of core  
 689 15-state model for 127 epigenomes were downloaded from Roadmap epigenomics web  
 690 portal  
 691 (<http://egg2.wustl.edu/roadmap/data/byFileType/chromhmmSegmentations/ChmmModels/coreMarks/jointModel/final/all.mnemonics.bedFiles.tgz>) in BED format. Then we  
 692 sampled random genomic ranges with the same size distribution as promoter (State 1)  
 693 and enhancer (State 7) regions from the background distribution using GAT[44]. The  
 694 background distribution was defined as the intersection of mappable regions of the  
 695 genome  
 696 ([https://www.cgat.org/downloads/public/gat/datasets/hg19/mapability\\_36.filtered.bed.gz](https://www.cgat.org/downloads/public/gat/datasets/hg19/mapability_36.filtered.bed.gz))  
 697 and genomic segments that belong to the first 13 chromatin states of ChromHMM  
 698 model (State 14: Weak repressed Polycomb and State 15: Quiescent are excluded). In  
 700 order to limit the computation time, 1000 samples were drawn and p-values smaller  
 701 than  $10^{-3}$  were extrapolated from normal distribution using “--pvalue-method=norm”  
 702 command line option.

### 703 bQTL overlap

704 bQTL results were downloaded from “Supplementary Table 2” of Tehranchi et al.[4] and  
 705 intersection with GM12878 deepSNPs is computed in R version 3.3.0.

*Eraslan G, Arloth J et al.*

## Transcription factor co-localization

ReMap project[33] provides a consolidated dataset for ChIP-seq peaks of several transcription factors including the ENCODE peaks as well as various public datasets. In order to quantify TF-TF colocalization patterns, we downloaded non-redundant peaks for 11 individual TFs in BED format from the web interface (<http://tagc.univ-mrs.fr/remap/index.php?page=download>) and then ran the annotation interface (<http://tagc.univ-mrs.fr/remap/index.php?page=annotation>) for each BED file separately. Downloaded TSV files with  $-\log_{10}$  transformed e-values are combined and plotted with corrplot R package[43]. Because very high  $-\log_{10}$ -transformed e-values obscure visualization, e-values are binarized with a cutoff of  $10^{-3}$ . Out of 12 TFs affected by 26 GM12878 deepSNPs 2 TFs are not shown in **Additional file 1: Figure S6** since p300 peaks are not available in ReMap dataset and CTCF did not show any significant association with other TFs.

## DNA methylation (GSK & MPIP)

For a subset of GSK (n=257 with 53% MDD cases) and MPIP cohort (n=229 with 52% MDD cases) genomic DNA was extracted from whole blood using the Gentra Puregene Blood Kit (QIAGEN). DNA quality and quantity of both was assessed by NanoDrop 2000 Spectrophotometer (Thermo Scientific) and Quant-iT Picogreen (Invitrogen). Genomic DNA was bisulfite converted using the Zymo EZ-96 DNA Methylation Kit (Zymo Research) and DNA methylation levels were assessed for >480,000 CpG sites using the Illumina HumanMethylation450 BeadChip array. Hybridization and processing was performed according to manufacturer's instructions. Quality control of methylation data,

*Eraslan G, Arloth J et al.*

including intensity read outs, filtering (detection p-value > 0.01 in at least 75% of the samples), cellular composition estimation according to[44], as well as beta calculation was done using the minfi Bioconductor R package version 1.18.2. Filtered beta values were reduced by eliminating any CpG sites on sex chromosomes, as well as probes found to have SNPs at the CpG site itself or in the single-base extension site with a MAF  $\geq$  1% in the 1,000 Genomes Project European population and/or non-specific binding probes according to[45]. Additionally, we performed a re-alignment of the array probe sequences using Bismark[45,46]. This yielded a total of around 425,000 GSK and MPIP CpG sites for further analysis. The data were then normalized with functional normalization[47]. Technical batch effects were identified by inspecting the association of the first principal components of the methylation levels with plate and plate position for the GSK sample as well as processing (experiment) date for the MPIP sample as technical batch. The data were then adjusted using ComBat[48]. To annotate CpGs for the closest genes, we used Annovar version February 2016[41] with the UCSCknown gene annotation. CpG coordinates are given according to hg19.

## Gene expression (MPIP)

Whole blood RNA of the MPIP sample (n=289 individuals) was collected using PAXgene Blood RNA Tubes (PreAnalytiX) and processed as described previously[21]. The RNA was then hybridized to Illumina HT-12 v3 and v4 expression Bead Chips (Illumina, San Diego, CA). Raw probe intensities were exported using Illumina's GenomeStudio and further statistical processing was carried out using R version 3.3.0. All 29,075 probes present on both BeadChips (v3 vs. v4), excluding X and Y chromosomes as well as cross-hybridizing probes identified by using the Re-Annotator

*Eraslan G, Arloth J et al.*

pipeline [21,49] were first filtered with a detection p-value of 0.05 in at least 50% of the samples, leaving 11,994 autosomal expression array probes. Subsequently, each probe was transformed and normalized through variance stabilization and normalization (VSN)[50]. Technical batch effects were identified by inspecting the association of the first principal components of the expression levels for all known batch effects and then adjusted using ComBat with slide, amplification round, array version, and amplification plate column as fixed effects. The position of the gene expression probe and gene symbols were annotated using the Re-Annotator pipeline based on hg19. Blood cell counts were estimated according to CellCODE [51].

## Statistical analysis of gene expression and methylation data

### Methylation QTL (meQTL) analysis

For each of the 26 deepSNP CpG sites within a 3Mb window around the SNP position were selected for the meQTL analysis. Due to low frequency of minor allele homozygotes for many SNPs, all SNP genotypes were coded and evaluated as a dominant model. Linear regression was used to measure the relationship between the DNA methylation (beta values) and the number of minor alleles (coded 0 and 1), including covariates for age, disease-state, gender and blood cell counts. So we defined the model for a single meQTL mapping as follows:  $CpG = \beta_0 + \beta_{sex}sex + \beta_{age}age + \beta_{CD8T}CD8T + \beta_{CD4T}CD4T + \beta_{NKcell}NKcell + \beta_{Bcell}Bcell + \beta_{Mono}Mono + \beta_{Gran}Gran + \beta_{disease\ status}disease\ status + \beta_{SNP}SNP + e$ , where e is the general error term for any residual variation not explained by the rest of the model.



*Eraslan G, Arloth J et al.*

In addition a differential meQTL analysis by the disease status was performed. Therefore an additive model adjusting for age, gender and blood cell counts was applied in controls and cases separately:

$$CpG = \beta_0 + \beta_{sex}sex + \beta_{age}age + \beta_{CD8T}CD8T + \beta_{CD4T}CD4T + \beta_{NKcell}NKcell + \beta_{Bcell}Bcell + \beta_{Mono}Mono + \beta_{SNP}SNP + e.$$

P-values were adjusted for the total number of CpG sites that were within the tested region surrounding the SNP. Case specific meQTLs were defined as meQTLs, which show a significant P-value in cases but not in controls (nominal p-value > 0.05). GSK and MIP data were analysed independently and a validation of meQTL results was carried out with a sample size-weighted Z-score meta-analysis [52]. This method accounts for different sizes and suggests the robustness the meQTLs.

Top hits were plotted with easyGgplot2 (<https://github.com/kassambara/easyGgplot2>), corplot R package [43] and Gviz 1.16.1 bioconductor package [53].

Expression QTL (eQTL) analysis

For each of deepSNP all transcripts beginning or ending within 1Mb up- or downstream of the SNP were determined. Associations between genotype (coded 0, 1 and 2) and expression levels (normalized and batch corrected log2 gene expression values) were determined in the MIP data set by linear regression, using sex, age, disease status and blood cell estimates as covariates:

$$GEX =$$

$$\beta_0 + \beta_{sex}sex + \beta_{age}age + \beta_{Neutrophil}Neutrophil + \beta_{Mono}Mono + \beta_{Bcell}Bcell +$$

Eraslan G, Arloth J et al.

$$\beta_{Tcell}Tcell + \beta_{NKcell}NKcell + \beta_{Plasmacell}Plasmacell + \beta_{DendriticCell}DendriticCell + \beta_{disease\ status}disease\ status + \beta_{SNP}SNP + e.$$

To correct for multiple testing, p-values were corrected for the number of transcripts per SNP.

Expression quantitative trait methylation (eQTM) analysis

For each of CpG site of the significant DeepQTL SNP- CpG pairs all transcripts beginning or ending within 1Mb up- or downstream of the CpG were determined. Associations between CpG and expression levels were determined in the MPIP data set by linear regression, using sex, age, disease status and blood cell estimates as covariates:

$$CpG = \beta_0 + \beta_{sex}sex + \beta_{age}age + \beta_{CD8T}CD8T + \beta_{CD4T}CD4T + \beta_{NKcell}NKcell + \beta_{Bcell}Bcell + \beta_{Mono}Mono + \beta_{Gran}Gran + \beta_{disease\ status}disease\ status + \beta_{GEX}GEX + e.$$

To correct for multiple testing, p-values were first corrected for the number of transcripts per SNP window.

Joint analysis

For the joint analysis we first measured the overlap of deepSNPs with eQTL, meQTL data and secondly for all overlapping pairs we calculated the overlap of meQTL CpGs and eQTM CpGs. For the deepSNPs, CpG, transcripts triplets we then assessed possible causal relationships by using a causal inference test [32].

The network was plotted using the R package igraph [54]. The triplet was plotted using ggplot2[55], corrplot R package [43] and Gviz 1.16.1 Bioconductor package [53].

*Eraslan G, Arloth J et al.*

# Declarations

## Availability of data and material

Data from MPIP gene expression experiment are deposited at the GEO repository under GEO: GSE64930 and methylation under: GSE74414. DeepWAS source code is available at DOI: 10.5281/zenodo.59282 through Zenodo.

## Competing interests

The authors declare that they have no competing interests.

## Funding

This work was funded by the German Federal Ministry of Education and Research through the Research Consortium Integrated Network IntegraMent (grant 01ZX1314H, to GE), the LiSyM Verbundprojekt Pillar II/III (grant 031L0047, to NSM) under the auspices of the e:Med Programme as well as the European Research Council (grant 281338 to EBB)

## Ethics approval and consent to participate

Both studies (recMDD and MPIP) were approved by the local ethics committee and all individuals gave written informed consent. All experimental methods comply with the Helsinki Declaration.

*Eraslan G, Arloth J et al.*

## Authors' contributions

NSM conceived and designed the study. GE and JA performed the research, analysed the data, developed the computational methods and created figures. GE, JA, EBB, FJT and NSM wrote the paper. JM and DC performed imputation of recMDD and MPIP genotypes. SI performed the pre-processing of the recMDD methylation data. EBB and FJT contributed to the study design.

## Acknowledgements

We thank Michael Laimighofer for feedback on the statistical approach. We thank Matthias Heinig for valuable comments on the manuscript. We would like to thank Martin Preusse for useful discussions on the approach.

## References

1. Visscher PM, Brown MA, McCarthy MI, Yang J. Five Years of GWAS Discovery. *Am. J. Hum. Genet.* 2012;90:7–24.
2. Gamazon ER, Wheeler HE, Shah KP, Mozaffari SV, Aquino-Michaels K, Carroll RJ, et al. A gene-based association method for mapping traits using reference transcriptome data. *Nat. Genet. Nature Research*; 2015;47:1091–.
3. Gamazon ER, Badner JA, Cheng L, Zhang C, Zhang D, Cox NJ, et al. Enrichment of cis-regulatory gene expression SNPs and methylation quantitative trait loci among bipolar disorder susceptibility variants. *Mol. Psychiatry. Nature Publishing Group*; 2013;18:340–6.
4. Tehranchi AK, Myrthil M, Martin T, Hie BL, Golan D, Fraser HB. Pooled ChIP-Seq Links Variation in Transcription Factor Binding to Complex Disease Risk. *Cell.* 2016;165:730–41.

*Eraslan G, Arloth J et al.*

- 865 5. Edwards SL, Beesley J, French JD, Dunning AM. Beyond GWASs: Illuminating the  
866 Dark Road from Association to Function. *The American Journal of Human Genetics*.  
867 2013;93:779–97.
- 868 6. Tak YG, Farnham PJ. Making sense of GWAS: using epigenomics and genome  
869 engineering to understand the functional relevance of SNPs in non-coding regions of  
870 the human genome. *Epigenetics & Chromatin* 2015 8:1. *BioMed Central*; 2015;8:1.
- 871 7. Maurano MT, Humbert R, Rynes E, Thurman RE, Haugen E, Wang H, et al.  
872 Systematic Localization of Common Disease-Associated Variation in Regulatory DNA.  
873 *Science*. American Association for the Advancement of Science; 2012;337:1190–5.
- 874 8. Hindorff LA, Sethupathy P, Junkins HA, Ramos EM, Mehta JP, Collins FS, et al.  
875 Potential etiologic and functional implications of genome-wide association loci for  
876 human diseases and traits. *Proc. Natl. Acad. Sci. U.S.A. National Acad Sciences*;  
877 2009;106:9362–7.
- 878 9. Robertson G, Hirst M, Bainbridge M, Bilenky M, Zhao Y, Zeng T, et al. Genome-wide  
879 profiles of STAT1 DNA association using chromatin immunoprecipitation and massively  
880 parallel sequencing. *Nature Methods*. Nature Publishing Group; 2007;4:651–7.
- 881 10. Coetzee SG, Coetzee GA, Hazelett DJ. motifbreakR: an R/Bioconductor package  
882 for predicting variant effects at transcription factor binding sites. *Bioinformatics*. Oxford  
883 University Press; 2015;31:btv470–3849.
- 884 11. Thomas-Chollier M, Hufton A, Heinig M, O'Keeffe S, Masri NE, Roeder HG, et al.  
885 Transcription factor binding predictions using TRAP for the analysis of ChIP-seq data  
886 and regulatory SNPs. *Nature Protocols*. Nature Research; 2011;6:1860–9.
- 887 12. Zhou J, Troyanskaya OG. Predicting effects of noncoding variants with deep  
888 learning-based sequence model. *Nature Methods*. Nature Research; 2015;12:931–4.
- 889 13. Consortium TEP. An integrated encyclopedia of DNA elements in the human  
890 genome. *Nature*. Nature Research; 2012;489:57–74.
- 891 14. Consortium RE, Kundaje A, Meuleman W, Ernst J, Bilenky M, Yen A, et al.  
892 Integrative analysis of 111 reference human epigenomes. *Nature*. Nature Research;  
893 2015;518:317–30.
- 894 15. Tibshirani R. Regression shrinkage and selection via the Lasso. *Journal of the*  
895 *Royal Statistical Society Series B-Methodological*. 1996;58:267–88.
- 896 16. Muglia P, Tozzi F, Galwey NW, Francks C, Upmanyu R, Kong XQ, et al. Genome-  
897 wide association study of recurrent major depressive disorder in two European case-  
898 control cohorts. *Mol. Psychiatry*. Nature Publishing Group; 2010;15:589–601.
- 899 17. Kendler KS, Gatz M, Gardner CO, Pedersen NL. A Swedish national twin study of  
900 lifetime major depression. *Am J Psychiatry*. American Psychiatric Publishing;

*Eraslan G, Arloth J et al.*

- 901 2006;163:109–14.
- 902 18. Levinson DF, Mostafavi S, Milaneschi Y, Rivera M, Ripke S, Wray NR, et al. Genetic  
903 Studies of Major Depressive Disorder: Why Are There No Genome-wide Association  
904 Study Findings and What Can We Do About It? *Biol. Psychiatry*. 2014;76:510–2.
- 905 19. Hyde CL, Nagle MW, Tian C, Chen X, Paciga SA, Wendland JR, et al. Identification  
906 of 15 genetic loci associated with risk of major depression in individuals of European  
907 descent. *Nat. Genet. Nature Research*; 2016.
- 908 20. Consortium SWGOTPG, Ripke S, Neale BM, Corvin A, Walters JT, Farh K-H, et al.  
909 Biological Insights From 108 Schizophrenia-Associated Genetic Loci. *Nature. Europe*  
910 *PMC Funders*; 2014;511:421–7.
- 911 21. Arloth J, Bogdan R, Weber P, Frishman G, Menke A, Wagner KV, et al. Genetic  
912 Differences in the Immediate Transcriptome Response to Stress Predict Risk-Related  
913 Brain Function and Psychiatric Disorders. *Neuron*. 2015;86:1189–202.
- 914 22. Consortium T1GP. A map of human genome variation from population-scale  
915 sequencing. *Nature. Nature Research*; 2011;473:544–4.
- 916 23. Delaneau O, Zagury J-F, Marchini J. Improved whole-chromosome phasing for  
917 disease and population genetic studies. *Nature Methods. Nature Research*; 2013;10:5–  
918 6.
- 919 24. Howie BN, Donnelly P, Marchini J. A Flexible and Accurate Genotype Imputation  
920 Method for the Next Generation of Genome-Wide Association Studies. Schork NJ,  
921 editor. *PLOS Genet. Public Library of Science*; 2009;5:e1000529.
- 922 25. Wohleb ES, Franklin T, Iwata M, Duman RS. Integrating neuroimmune systems in  
923 the neurobiology of depression. *Nat. Rev. Neurosci. Nature Research*; 2016;17:497–  
924 511.
- 925 26. Mostafavi S, Battle A, Zhu X, Potash JB, Weissman MM, Shi J, et al. Type I  
926 interferon signaling genes in recurrent major depression: increased expression detected  
927 by whole-blood RNA sequencing. *Mol. Psychiatry. Nature Publishing Group*;  
928 2014;19:1267–74.
- 929 27. Hsu F, Kent WJ, Clawson H, Kuhn RM, Diekhans M, Haussler D. The UCSC Known  
930 Genes. *Bioinformatics. Oxford University Press*; 2006;22:1036–46.
- 931 28. Bhat S, Dao DT, Terrillion CE, Arad M, Smith RJ, Soldatov NM, et al. CACNA1C  
932 (Cav1.2) in the pathophysiology of psychiatric disease. *Prog. Neurobiol.* 2012;99:1–14.
- 933 29. Van Den Bossche MJ, Strazisar M, De Bruyne S, Bervoets C, Lenaerts A-S, De  
934 Zutter S, et al. Identification of a CACNA2D4 deletion in late onset bipolar disorder  
935 patients and implications for the involvement of voltage-dependent calcium channels in  
936 psychiatric disorders. *Am. J. Med. Genet. B Neuropsychiatr. Genet. Wiley Subscription*

*Eraslan G, Arloth J et al.*

- 937 Services, Inc., A Wiley Company; 2012;159B:465–75.
- 938 30. Ni P, Ma X, Lin Y, Lao G, Hao X, Guan L, et al. Methionine sulfoxide reductase A  
939 (MsrA) associated with bipolar I disorder and executive functions in A Han Chinese  
940 population. *J Affect Disord.* 2015;184:235–8.
- 941 31. Walss-Bass C, Soto-Bernardini MC, Johnson-Pais T, Leach RJ, Ontiveros A,  
942 Nicolini H, et al. Methionine sulfoxide reductase: a novel schizophrenia candidate gene.  
943 *Am. J. Med. Genet. B Neuropsychiatr. Genet.* Wiley Subscription Services, Inc., A Wiley  
944 Company; 2009;150B:219–25.
- 945 32. Millstein J, Zhang B, Zhu J, Schadt EE. Disentangling molecular relationships with a  
946 causal inference test. *BMC Genet. BioMed Central*; 2009;10.
- 947 33. Griffon A, Barbier Q, Dalino J, van Helden J, Spicuglia S, Ballester B. Integrative  
948 analysis of public ChIP-seq experiments reveals a complex multi-cell regulatory  
949 landscape. *Nucl. Acids Res. Oxford University Press*; 2015;43:e27–7.
- 950 34. Lee D, Karchin R, Beer MA. Discriminative prediction of mammalian enhancers from  
951 DNA sequence. *Genome Res. Cold Spring Harbor Lab*; 2011;21:2167–80.
- 952 35. Waldmann P, Mészáros G, Gredler B, Fuerst C, Sölkner J. Evaluation of the lasso  
953 and the elastic net in genome-wide association studies. *Frontiers in Genetics. Frontiers*;  
954 2013;4.
- 955 36. Ayers KL, Cordell HJ. SNP Selection in genome-wide and candidate gene studies  
956 via penalized logistic regression. *Genetic Epidemiology. Wiley Subscription Services,*  
957 *Inc., A Wiley Company*; 2010;34:879–91.
- 958 37. Dehman A, Ambroise C, Neuvial P. Performance of a blockwise approach in  
959 variable selection using linkage disequilibrium information. *BMC Bioinformatics. BioMed*  
960 *Central*; 2015;16.
- 961 38. Chen SX, Cherry A, Tari PK, Podgorski K, Kwong YKK, Haas K. The Transcription  
962 Factor MEF2 Directs Developmental Visually Driven Functional and Structural  
963 Metaplasticity. *Cell.* 2012;151:41–55.
- 964 39. Barbosa AC, Kim M-S, Ertunc M, Adachi M, Nelson ED, McAnally J, et al. MEF2C, a  
965 transcription factor that facilitates learning and memory by negative regulation of  
966 synapse numbers and function. *Proc. Natl. Acad. Sci. U.S.A. National Acad Sciences*;  
967 2008;105:9391–6.
- 968 40. Pfeiffer BE, Zang T, Wilkerson JR, Taniguchi M, Maksimova MA, Smith LN, et al.  
969 Fragile X Mental Retardation Protein Is Required for Synapse Elimination by the  
970 Activity-Dependent Transcription Factor MEF2. *Neuron.* 2010;66:191–7.
- 971 41. Wang K, Li M, Hakonarson H. ANNOVAR: functional annotation of genetic variants  
972 from high-throughput sequencing data. *Nucl. Acids Res. Oxford University Press*;



*Eraslan G, Arloth J et al.*

- 973 2010;38:–e164.
- 974 42. Friedman J, Hastie T, Tibshirani R. glmnet: Lasso and elastic-net regularized  
975 generalized linear models. R package version; 2009.
- 976 43. Wie T. Corrplot: Visualization of a correlation matrix-R package version 0.71.  
977 Retrieved August; 2013.
- 978 44. Houseman E, Accomando WP, Koestler DC, Christensen BC, Marsit CJ, Nelson  
979 HH, et al. DNA methylation arrays as surrogate measures of cell mixture distribution.  
980 BMC Bioinformatics. BioMed Central; 2012;13:86.
- 981 45. Chen Y-A, Lemire M, Choufani S, Butcher DT, Grafodatskaya D, Zanke BW, et al.  
982 Discovery of cross-reactive probes and polymorphic CpGs in the Illumina Infinium  
983 HumanMethylation450 microarray. Epigenetics. Taylor & Francis; 2014;8:203–9.
- 984 46. Krueger F, Andrews SR. Bismark: a flexible aligner and methylation caller for  
985 Bisulfite-Seq applications. Bioinformatics. Oxford University Press; 2011;27:1571–2.
- 986 47. Fortin J-P, Labbe A, Lemire M, Zanke BW, Hudson TJ, Fertig EJ, et al. Functional  
987 normalization of 450k methylation array data improves replication in large cancer  
988 studies. Genome Biol. BioMed Central; 2014;15:1.
- 989 48. Johnson WE, Li C, Rabinovic A. Adjusting batch effects in microarray expression  
990 data using empirical Bayes methods. Biostatistics. Oxford University Press;  
991 2006;8:118–27.
- 992 49. Arloth J, Bader DM, Röh S, Altmann A. Re-Annotator: Annotation Pipeline for  
993 Microarray Probe Sequences. Xue Y, editor. PLOS ONE. Public Library of Science;  
994 2015;10:e0139516.
- 995 50. Lin SM, Du P, Huber W, Kibbe WA. Model-based variance-stabilizing transformation  
996 for Illumina microarray data. Nucl. Acids Res. Oxford University Press; 2007;36:e11–1.
- 997 51. Chikina M, Zaslavsky E, Sealfon SC. CellCODE: A robust latent variable approach  
998 to differential expression analysis for heterogeneous cell populations. Bioinformatics.  
999 Oxford University Press; 2015;31:1584–91.
- 1000 52. Evangelou E, Ioannidis JPA. Meta-analysis methods for genome-wide association  
1001 studies and beyond. Nature Reviews Genetics. Nature Research; 2013;14:379–89.
- 1002 53. Hahne F, Ivanek R. Visualizing Genomic Data Using Gviz and Bioconductor.  
1003 Methods Mol. Biol. New York, NY: Springer New York; 2016;1418:335–51.
- 1004 54. Csardi G, Nepusz T. The igraph software package for complex network research.  
1005 InterJournal. 2006.
- 1006 55. Wickham H. ggplot2. Cham: Springer; 2016.



*Eraslan G, Arloth J et al.*

1007
