# Supplementary material for: DeepWAS: Multivariate genotype-phenotype associations by directly integrating regulatory information using deep learning
Source: bioRxiv or medRxiv preprint supplement (doi:10.1101/069096), 2018-12-05
Supplement: Supplementary file [file 069096-1.pdf]

# DeepWAS: Directly integrating regulatory information into GWAS using deep learning supports master regulator MEF2C as risk factor for major depressive disorder

Gökçen Eraslan, Janine Arloth, Jade Martins, Stella Iurato, Darina Czamara, Elisabeth B. Binder, Fabian J. Theis, Nikola S. Mueller

## Supplementary materials

### Content:

|                                                                                                                                                                                                                               |    |
|-------------------------------------------------------------------------------------------------------------------------------------------------------------------------------------------------------------------------------|----|
| Supplementary materials .....                                                                                                                                                                                                 | 1  |
| Supplementary Figures .....                                                                                                                                                                                                   | 2  |
| <b>Figure S1: Genome-wide representation of MDD associations in the GSK data set.</b> ...                                                                                                                                     | 2  |
| <b>Figure S2: Number of SNP features in LASSO models for 5 cell lines</b> .....                                                                                                                                               | 3  |
| <b>Figure S3: FDR-corrected p-values of LASSO models of all functional units.</b> .....                                                                                                                                       | 4  |
| <b>Figure S4: Enrichment of regulatory SNPs in promoters and enhancers identified by 15-state ChromHMM model in various tissues.</b> .....                                                                                    | 5  |
| <b>Figure S5: Disease specific meQTL results for the blood deepSNP rs7661078.</b> .....                                                                                                                                       | 6  |
| <b>Figure S6: TF-TF associations from ReMap project</b> .....                                                                                                                                                                 | 7  |
| <b>Table S1: Significant blood deepSNPs associated with MDD-specific methylation changes</b> .....                                                                                                                            | 8  |
| Significant blood deepSNPs representing a case-specific meQTL (recMDD cohort). P values are corrected according to Bonferroni for the number of tested CpGs per SNP. ....                                                     | 8  |
| <b>Table S2: Association of CpG methylation of the deepSNP-CpG pairs and gene expression</b> .....                                                                                                                            | 9  |
| Table lists CpG methylation sites associated to MDD deepSNPs on matched gene expression levels from the MPIP cohort (eQTM). P values are corrected according to Bonferroni for the number of tested transcripts per CpG. .... | 9  |
| <b>Table S3: Significant blood deepSNPs representing an eQTL</b> .....                                                                                                                                                        | 10 |
| Significant blood deepSNPs representing an eQTL in th MPIP cohort. P values are corrected according to Bonferroni for the number of tested transcripts per SNP. ....                                                          | 10 |

## Supplementary Figures

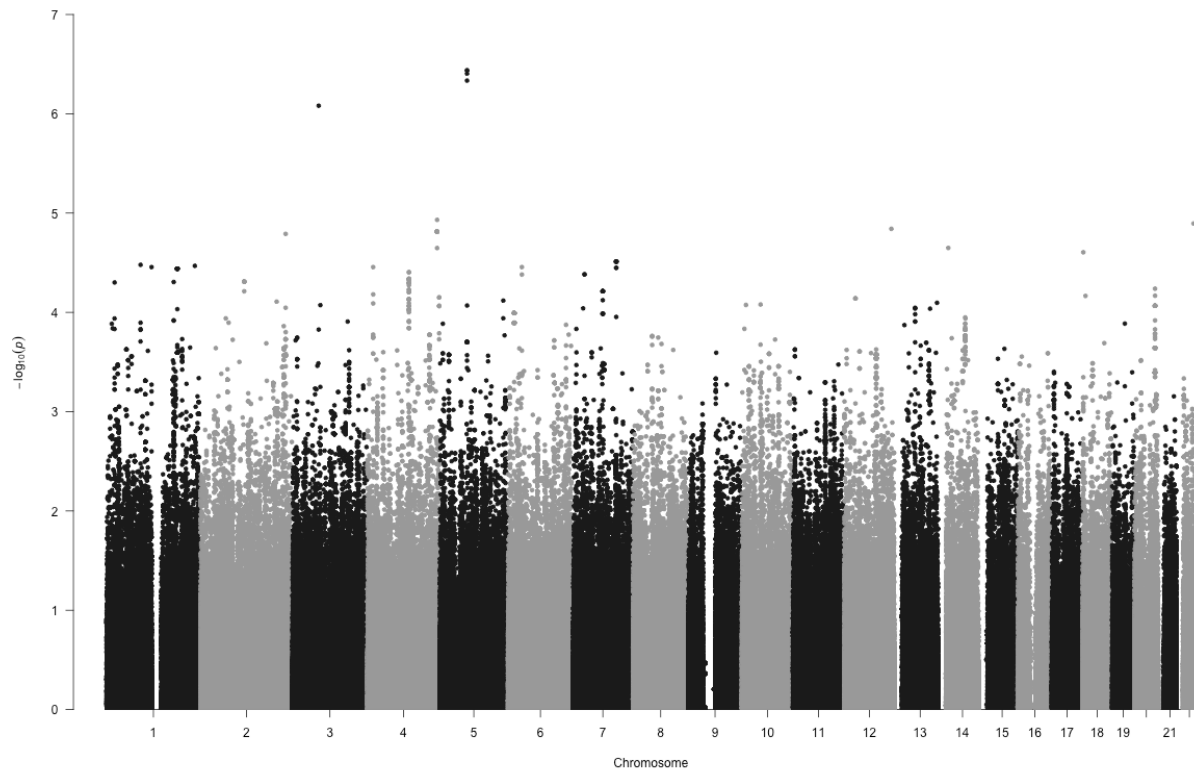

**Figure S1: Genome-wide representation of MDD associations in the GSK data set.**

Manhattan plot shows the strength of evidence for association (p value) in the recMDD cohort. Each variant is shown as a dot, with alternating shades according to chromosome.

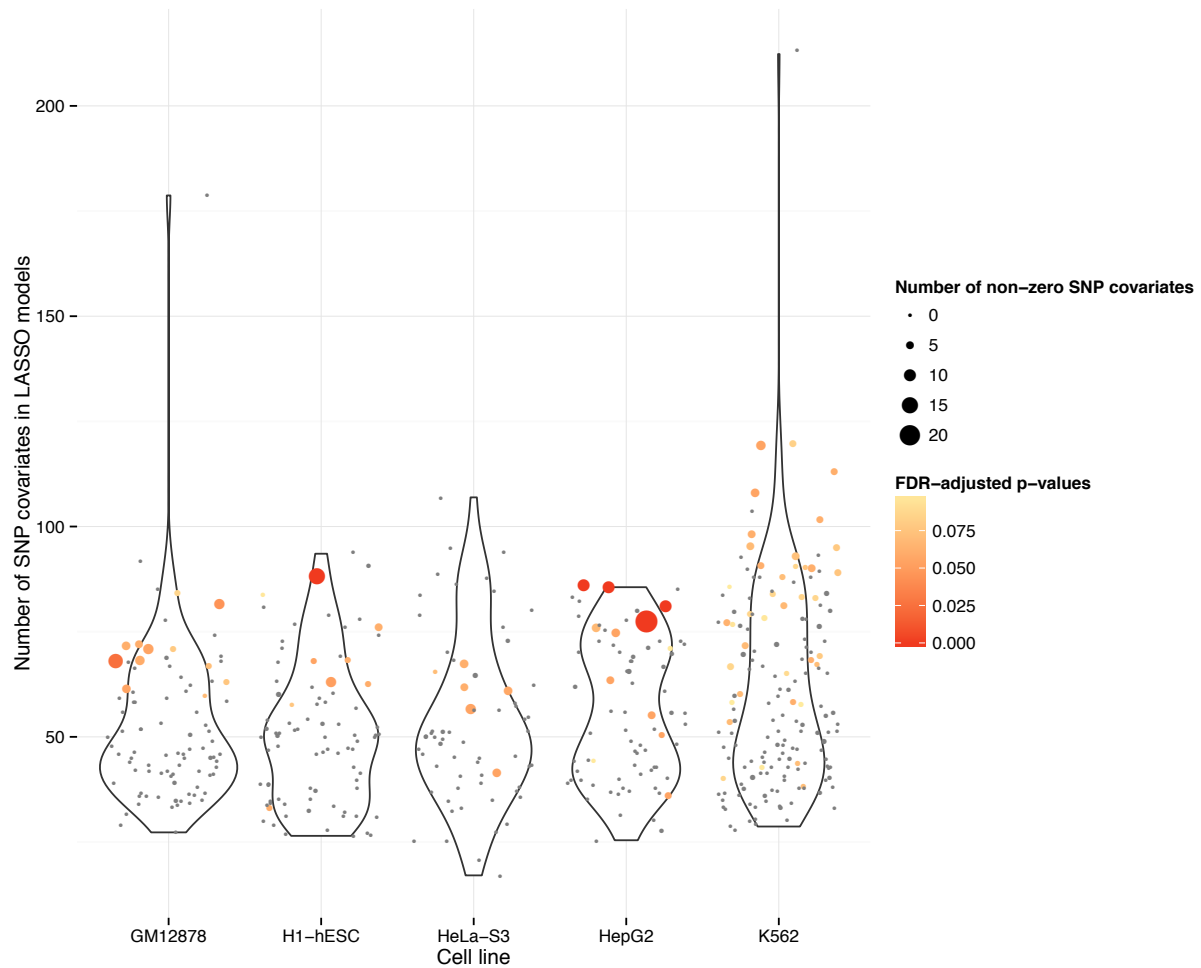

**Figure S2: Number of SNP features in LASSO models for 5 cell lines**

Each point represents a LASSO model for 5 cell lines and various regulatory elements. Color code shows the significance of each model whereas y-axis shows the number of SNP features in each model. The size of the points represents number of SNPs that are selected in LASSO models i.e. SNP predictors with non-zero regression coefficients.



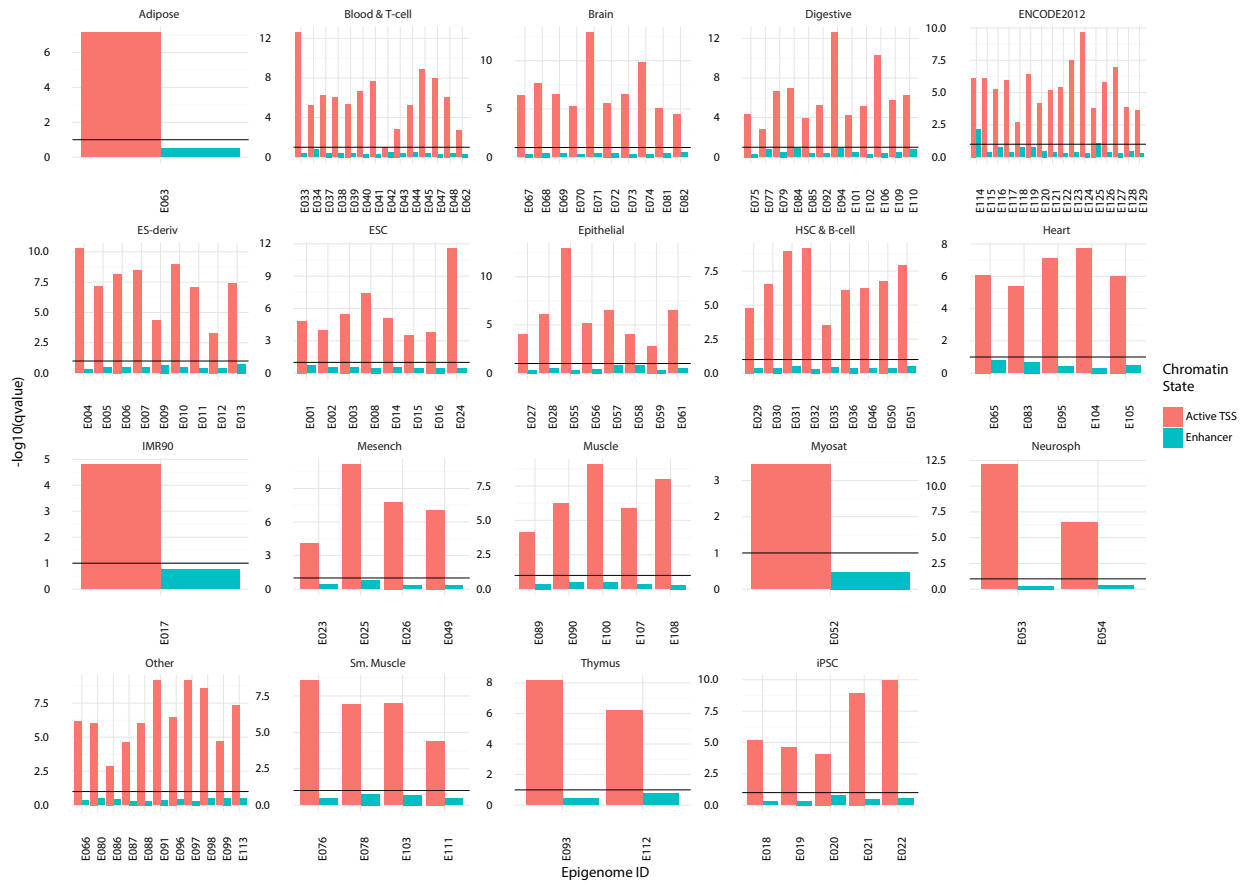

**Figure S4: Enrichment of regulatory SNPs in promoters and enhancers identified by 15-state ChromHMM model in various tissues.**

x-axis and y-axis represent Roadmap epigenome IDs and FDR-adjusted p-values, respectively. 0.1 FDR cutoff is shown as a horizontal line. Color coding indicates regulatory elements.

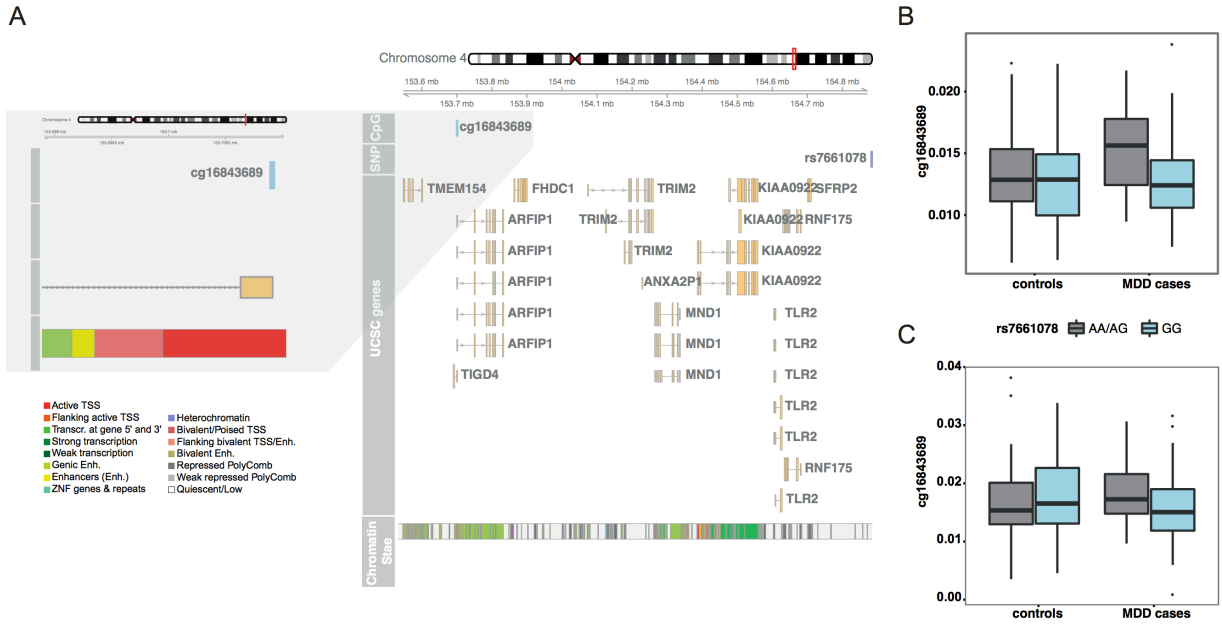

**Figure S5: Disease specific meQTL results for the blood deepSNP rs7661078**

**(A)** Overview of the rs7661078 meQTL locus on chromosome 5. Top panel, ideogram for chromosome 4. A red box isolates the region shown (enlarged) in the bottom panels. Bottom panels: Location of CpG cg16843689 that is significantly associated with rs7661078, SNP position, genes nearby (based on UCSC knownGene annotation) and annotation of chromatin states (based on GM12878 15-state core ChromHMM model). **(B)** Association of rs7661078 (dominant SNP model) and cg16843689 stratified by the disease status within the recMDD cohort. **(C)** Validation of this case specific meQTL in the MPIP cohort. Y-axis in B and C shows the DNAm levels (beta values) and the x-axis represents the disease-status.

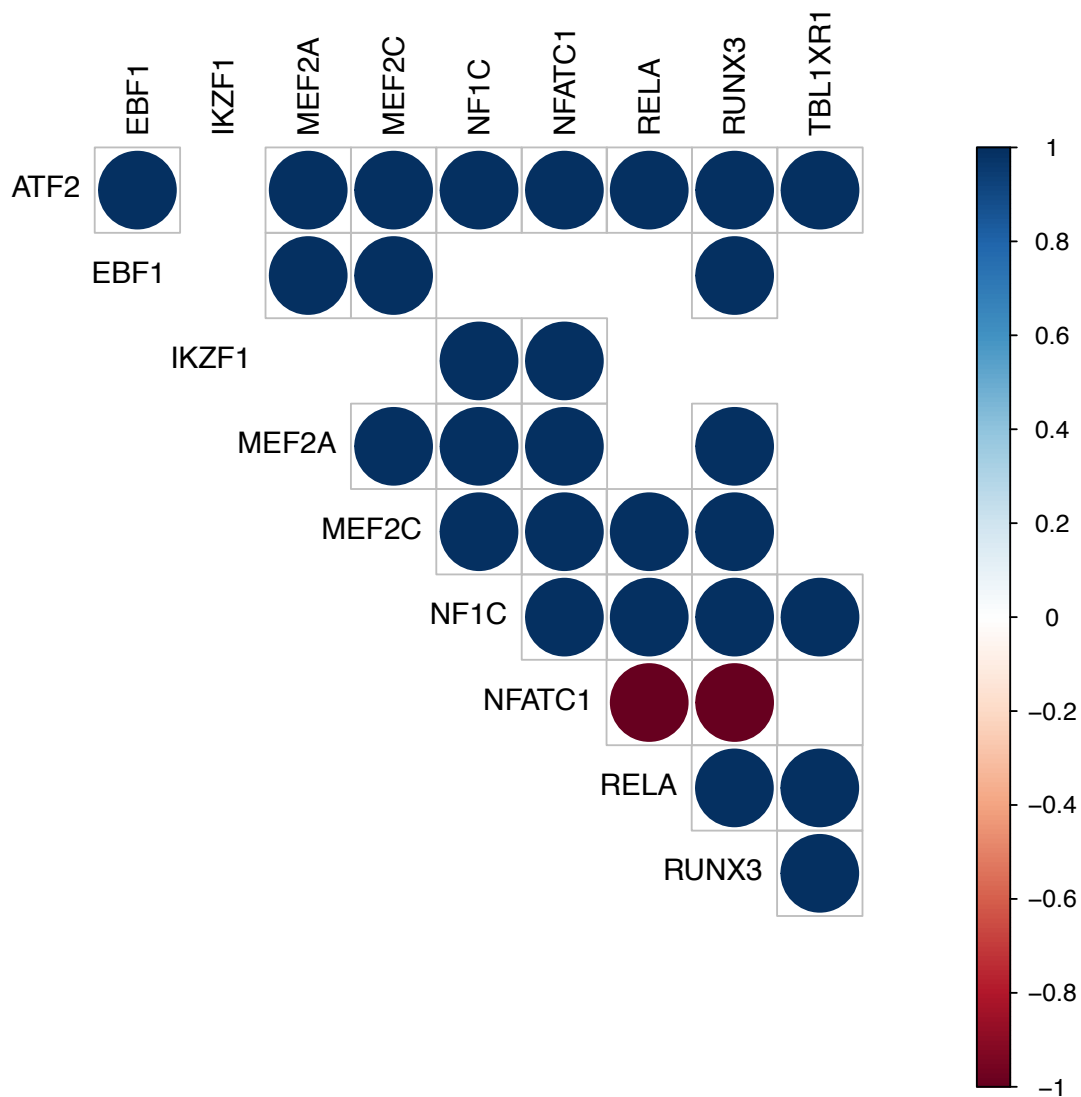

**Figure S6: TF-TF associations from ReMap project**

Overlap between ChIP-seq peaks of various transcription factors. ReMap annotation tool was used with 90% minimum overlap constraint on both BED files. e-values provided by the annotation tool of ReMap is binarized using a cutoff of  $10^{-3}$ . Note that; NF1C, RELA and TBLXR1 in ReMap dataset correspond to the transcription factors NFIC, NFKB and TBL1 in our study.

## Supplementary Tables and Table Descriptions

| CpG        | SNP       | Chr | SNP Position | SNP Location | Genes nearby SNP | CpG Position | CpG Location | Genes nearby CpG | P value | Validation     |
|------------|-----------|-----|--------------|--------------|------------------|--------------|--------------|------------------|---------|----------------|
| cg02157078 | rs486755  | 1   | 114884179    | intergenic   | SYT6,TRIM33      | 114888769    | intergenic   | SYT6,TRIM33      | 0.00176 | yes            |
| cg08169020 | rs6573943 | 14  | 70699464     | intergenic   | SLC8A3,ADAM21P1  | 69256840     | exonic       | ZFP36L1          | 0.0266  | no             |
| cg09535027 | rs7939217 | 11  | 85280702     | intronic     | DLG2             | 86432027     | intergenic   | ME3,PRSS23       | 0.031   | same direction |
| cg11247129 | rs2150175 | 6   | 97269213     | intronic     | GPR63            | 97457432     | intronic     | KLHL32           | 0.0397  | no             |
| cg16843689 | rs7661078 | 4   | 154883600    | intergenic   | SFRP2,DCHS2      | 153700888    | UTR5         | TIGD4            | 0.00173 | yes            |

**Table S1: Significant blood deepSNPs associated with MDD-specific methylation changes**

Significant blood deepSNPs representing a case-specific meQTL (recMDD cohort). P values are corrected according to Bonferroni for the number of tested CpGs per SNP.

- CpG: CpG identifier (Illumina 450k)
- SNP: SNP identifier
- Chr: Chromosome number
- SNP/CpG position: Genomic position of SNP/CpG in hg19 assembly
- SNP/CpG location: The most important SNP/CpG location according to ANNOVAR is listed
- Genes nearby SNP/CpG: If the SNP is exonic/intronic/ncRNA, the name of the gene is listed, if not, the two neighboring genes are listed.
- P value: Bonferroni corrected p values
- Validation: Validation of association in MPIP cohort.



| CpG        | Probe Id     | Chr | CpG Position | Genes nearby CpG | CpG location | P start  | P end    | P gene   | P value |
|------------|--------------|-----|--------------|------------------|--------------|----------|----------|----------|---------|
| cg19235974 | ILMN_1696317 | 12  | 1063148      | RAD52,ERC1       | intergenic   | 1901374  | 1901423  | CACNA2D4 | 0.048   |
| cg19235974 | ILMN_1859030 | 12  | 1063148      | RAD52,ERC1       | intergenic   | 2329963  | 2330012  | CACNA1C  | 0.05    |
| cg21290162 | ILMN_2228180 | 8   | 9741911      | TNKS,LINC00599   | intergenic   | 10286154 | 10286205 | MSRA     | 0.031   |

**Table S2: Association of CpG methylation of the deepSNP-CpG pairs and gene expression**

Table lists CpG methylation sites associated to MDD deepSNPs on matched gene expression levels from the MPIP cohort (eQTM). P values are corrected according to Bonferroni for the number of tested transcripts per CpG.

- CpG: CpG identifier (Illumina 450k)
- Probe Id: gene expression probe identifier (Human HT-12 v3 and v4)
- Chr: Chromosome number
- CpG position: Genomic position of CpG in hg19 assembly
- CpG location: The most important CpG location according to ANNOVAR is listed
- Genes nearby CpG: If the SNP is exonic/intronic/ncRNA, the name of the gene is listed, if not, the two neighboring genes are listed.
- P start/P end: transcript position in hg19 assembly
- P gene: transcript gene
- P value: Bonferroni corrected p values

| Probe Id     | SNP        | Chr | SNP Position | SNP Location | Genes nearby SNP | P start  | P end    | P gene  | P value  |
|--------------|------------|-----|--------------|--------------|------------------|----------|----------|---------|----------|
| ILMN_2228180 | rs12541159 | 8   | 9769098      | intergenic   | MIR124-1,MSRA    | 10286154 | 10286205 | MSRA    | 0.0225   |
| ILMN_1765332 | rs1868881  | 11  | 57901176     | intronic     | OR9Q1            | 57296017 | 57296066 | TIMM10  | 0.00276  |
| ILMN_1794825 | rs4646797  | 17  | 19560368     | intronic     | ALDH3A2          | 19580356 | 19580406 | ALDH3A2 | 1.57e-06 |

**Table S3: Significant blood deepSNPs representing an eQTL**

Significant blood deepSNPs representing an eQTL in th MPIP cohort. P values are corrected according to Bonferroni for the number of tested transcripts per SNP.

- Probe Id: gene expression probe identifier (Human HT-12 v3 and v4)
- SNP: SNP identifier
- Chr: Chromosome number
- SNPposition: Genomic position of SNP in hg19 assembly
- SNP location: The most important SNP location according to ANNOVAR is listed
- Genes nearby SNP: If the SNP is exonic/intronic/ncRNA, the name of the gene is listed, if not, the two neighboring genes are listed.
- P start/P end: transcript position in hg19 assembly
- P gene: transcript gene
- P value: Bonferroni corrected p values
